# Supplementary material for: CHI3L1 on fibrinolytic system imbalance in chronic rhinosinusitis with nasal polyp
Source: Front Immunol. 2024 Jun 21;15:1410948. doi: 10.3389/fimmu.2024.1410948 (PMC11224434; doi:10.3389/fimmu.2024.1410948)
Supplement: Supplementary file 7 [file Table_4.xlsx]

## Sheet: PLAT- Basal_cell
Unnamed: 0	p_val	avg_log2FC	pct.1	pct.2	p_val_adj
IGHG4	1.79441e-165	-3.67756	0.092	0.852	5.2456e-161
BPIFA1	6.67861e-94	7.03518	0.935	0.115	1.95236e-89
MASP1	9.63142e-91	-4.70616	0.016	0.355	2.81555e-86
TNFRSF6B	4.59574e-89	-4.19017	0.048	0.492	1.34347e-84
SLPI	1.89142e-87	4.37024	0.947	0.399	5.5292e-83
IGKC	2.48581e-83	-0.70684	0.829	1	7.26677e-79
P2RY6	2.27206e-80	-5.08778	0.004	0.251	6.6419e-76
CLDN5	7.08109e-79	-2.34284	0.513	0.984	2.07001e-74
SCARB1	3.62291e-75	-2.68545	0.11	0.628	1.05909e-70
CETP	2.0116e-71	-3.90826	0.023	0.339	5.8805e-67
PLAT	4.00268e-71	2.74428	1	1	1.1701e-66
CYGB	6.85412e-71	-2.8205	0.082	0.546	2.00367e-66
HRH1	2.29966e-69	-2.6118	0.087	0.557	6.72258e-65
CCDC3	5.5521e-69	-2.12128	0.395	0.94	1.62304e-64
IL3RA	9.65226e-69	-2.19766	0.25	0.831	2.82165e-64
GPR68	7.03119e-63	-2.69778	0.066	0.47	2.05543e-58
CST1	1.15937e-62	-4.06987	0.008	0.23	3.38919e-58
RPS4Y1	1.95189e-61	-2.39313	0.118	0.59	5.70595e-57
ADM5	3.29858e-61	-2.73362	0.144	0.634	9.64273e-57
MYL9	6.40952e-61	-1.90062	0.403	0.945	1.87369e-56
FKBP1A	6.53515e-61	-1.43284	0.853	0.989	1.91042e-56
SLAMF1	1.8582e-59	-4.55456	0.014	0.257	5.43206e-55
RCAN1	1.36701e-58	-3.01143	0.139	0.607	3.99617e-54
KYNU	2.83465e-58	-2.72305	0.045	0.388	8.28653e-54
FAM167B	2.28022e-56	-2.36591	0.181	0.689	6.66577e-52
PTGFRN	3.96188e-56	-2.84969	0.029	0.317	1.15818e-51
CLDN15	1.0702e-55	-2.05904	0.15	0.645	3.12852e-51
CTNNAL1	2.25136e-55	-1.97559	0.503	0.929	6.5814e-51
INHBB	1.07669e-54	-2.69155	0.111	0.546	3.14748e-50
CLU	4.994e-54	2.27941	0.946	0.721	1.45989e-49
AC103718.1	5.69817e-54	-4.95585	0.003	0.169	1.66575e-49
SCGB1A1	2.24311e-53	10.5167	0.674	0.011	6.55727e-49
BPIFB1	5.04145e-53	4.48851	0.746	0.186	1.47377e-48
DDX3Y	5.93196e-53	-2.06714	0.069	0.448	1.73409e-48
CCL18	3.18408e-52	-10.1146	0	0.137	9.30803e-48
TCTEX1D1	6.4969e-52	-2.04906	0.094	0.508	1.89924e-47
LGI2	1.10174e-51	-4.34931	0.006	0.186	3.22071e-47
FADS3	3.14588e-51	-2.24224	0.123	0.563	9.19634e-47
PCSK6	5.61758e-51	-2.81772	0.025	0.284	1.64219e-46
BATF	9.34829e-51	-2.76574	0.06	0.404	2.73279e-46
GSDMC	1.00342e-50	-4.11104	0.009	0.202	2.9333e-46
GAPDH	3.03212e-49	-1.06253	0.93	1	8.86379e-45
CYTL1	2.96346e-48	-2.75697	0.057	0.383	8.66309e-44
RFLNB	1.67937e-47	-2.10124	0.276	0.77	4.90929e-43
CCL26	3.65922e-46	-9.65497	0.003	0.148	1.0697e-41
OSMR	1.18478e-45	-1.57553	0.251	0.781	3.46347e-41
PVT1	1.93597e-45	-2.0959	0.078	0.437	5.65942e-41
RNF122	3.94537e-45	-2.60968	0.045	0.333	1.15335e-40
SGIP1	8.63414e-45	-2.72067	0.019	0.235	2.52402e-40
IGHA1	1.62e-44	-0.846375	0.575	0.967	4.73574e-40
IGLC2	3.54792e-44	0.13913	0.445	0.929	1.03716e-39
MGAT3	1.02603e-43	-2.77042	0.029	0.273	2.99941e-39
RPLP0	1.25835e-43	-0.84436	0.965	1	3.67855e-39
RPS10	4.02806e-43	-1.04479	0.721	0.984	1.17752e-38
EGLN3	5.08741e-43	-2.44125	0.152	0.568	1.4872e-38
ITIH5	1.55677e-42	-2.54126	0.08	0.415	4.55089e-38
JAM2	3.10057e-42	-1.12147	0.733	0.984	9.06391e-38
MTHFD2	4.04465e-42	-2.55173	0.04	0.306	1.18237e-37
UFD1	9.67762e-42	-1.46536	0.359	0.858	2.82906e-37
SLC5A3	9.84447e-42	-2.19172	0.086	0.432	2.87783e-37
AC114757.1	1.56024e-41	-3.42783	0.005	0.153	4.56105e-37
PTP4A3	1.71937e-41	-1.76271	0.178	0.628	5.02623e-37
ANGPT2	4.23196e-41	-2.86523	0.096	0.448	1.23713e-36
ZNF385D	6.46001e-41	-1.50003	0.472	0.885	1.88845e-36
PLAU	8.40172e-41	-3.7373	0.016	0.208	2.45608e-36
SOCS3	1.46657e-40	-1.41623	0.57	0.951	4.28721e-36
STATH	2.55191e-40	8.38746	0.6	0.077	7.45998e-36
PRKY	3.38197e-40	-2.57512	0.021	0.23	9.88651e-36
BACE2	4.2597e-40	-1.54206	0.37	0.831	1.24524e-35
MCTP1	6.16742e-40	-1.51355	0.403	0.874	1.80292e-35
ZG16B	6.76148e-40	8.14555	0.573	0.027	1.97658e-35
IFITM2	8.65112e-40	-0.921781	0.833	0.995	2.52898e-35
EEF1A1	8.81052e-40	-0.616744	0.999	1	2.57558e-35
CTNNA3	1.05932e-39	-6.43816	0.001	0.109	3.09671e-35
RELL1	2.621e-39	-1.71539	0.274	0.732	7.66196e-35
RELB	3.80439e-39	-2.05018	0.061	0.361	1.11214e-34
JCHAIN	5.92429e-39	-0.635263	0.287	0.792	1.73185e-34
COL15A1	1.84749e-38	-1.4648	0.566	0.891	5.40078e-34
XIST	2.47833e-38	1.8591	0.819	0.383	7.2449e-34
LYZ	2.89409e-38	4.91797	0.609	0.115	8.4603e-34
MTFP1	3.35324e-38	-2.03266	0.045	0.311	9.80253e-34
USP9Y	5.12805e-38	-2.65716	0.027	0.246	1.49908e-33
HTRA1	7.3821e-38	-1.35571	0.505	0.929	2.15801e-33
MRPS6	7.47362e-38	-1.72221	0.191	0.634	2.18476e-33
TMEM74B	1.15659e-37	-5.56167	0.002	0.115	3.38106e-33
C1orf54	1.94514e-37	-1.5212	0.205	0.65	5.68623e-33
LAMA5	3.21895e-37	-1.13068	0.318	0.814	9.40996e-33
RPS6	3.97054e-37	-0.764435	0.99	1	1.16071e-32
IGHGP	5.17539e-37	-0.202934	0.007	0.148	1.51292e-32
SEMA6B	5.60392e-37	-1.43872	0.222	0.683	1.63819e-32
LINC01235	5.96285e-37	-4.7906	0.008	0.153	1.74312e-32
B2M	8.22111e-37	0.521991	1	1	2.40328e-32
MT-CO1	9.44753e-37	-0.581477	0.999	1	2.7618e-32
CAMK1D	1.16832e-36	-1.5343	0.171	0.596	3.41534e-32
STC2	1.56218e-36	-2.23116	0.047	0.306	4.56672e-32
TNFRSF4	4.14674e-36	-3.21392	0.035	0.262	1.21222e-31
TUBB3	4.38748e-36	-2.72935	0.017	0.197	1.28259e-31
ADIRF	5.55986e-36	1.31069	0.946	0.787	1.62531e-31
FBLN7	8.79682e-36	-2.62033	0.028	0.24	2.57157e-31
ANGPTL4	1.01078e-35	-3.26603	0.017	0.197	2.95481e-31
CD200R1	1.06754e-35	-2.91063	0.019	0.202	3.12074e-31
DNASE1L3	1.58281e-35	3.35637	0.689	0.268	4.62701e-31
SOX17	1.7814e-35	-1.35211	0.326	0.798	5.20756e-31
SH2B2	2.9896e-35	-2.72261	0.026	0.23	8.7395e-31
MAN2B1	7.337e-35	-1.73778	0.085	0.404	2.14483e-30
ZFY	2.59009e-34	-2.32773	0.014	0.18	7.5716e-30
AHR	4.50101e-34	-1.26587	0.557	0.913	1.31578e-29
IGFBP3	6.58014e-34	-2.14487	0.108	0.432	1.92357e-29
EEF2	1.04015e-33	-0.686303	0.908	1	3.04068e-29
AC000082.1	1.08188e-33	-2.1647	0.024	0.219	3.16265e-29
PTAFR	3.53443e-33	-2.20271	0.063	0.333	1.03322e-28
RAI14	4.18436e-33	-1.3265	0.37	0.825	1.22321e-28
MALL	4.93183e-33	-1.47464	0.471	0.874	1.44172e-28
CCL2	6.22364e-33	-2.2909	0.075	0.361	1.81936e-28
KCNJ2	6.70295e-33	-3.04202	0.02	0.197	1.95947e-28
MIF	6.73835e-33	-0.895422	0.786	0.984	1.96982e-28
IL13RA2	7.3648e-33	-3.88817	0.009	0.148	2.15295e-28
IGHG3	7.54841e-33	-0.161938	0.107	0.437	2.20663e-28
MATN2	8.20452e-33	-1.68909	0.241	0.661	2.39843e-28
LCP2	8.35583e-33	-3.02735	0.019	0.191	2.44266e-28
CDC45	8.52234e-33	-4.80284	0.004	0.115	2.49133e-28
ACOT7	1.29327e-32	-1.94983	0.06	0.328	3.78061e-28
CST3	1.84224e-32	-0.975631	0.954	1	5.38542e-28
LAMP3	2.72641e-32	-5.27076	0.003	0.109	7.97012e-28
TACR1	3.5679e-32	-1.89826	0.138	0.486	1.04301e-27
SELENOP	5.6361e-32	1.72519	0.829	0.765	1.6476e-27
CSRP2	5.83013e-32	-1.57761	0.232	0.628	1.70432e-27
IGHE	7.30279e-32	-6.79679	0	0.082	2.13482e-27
FKBP11	1.63684e-31	-1.62385	0.299	0.732	4.78497e-27
ORAI1	2.14576e-31	-1.29096	0.292	0.743	6.2727e-27
GALNT18	2.49238e-31	-1.21026	0.221	0.661	7.28596e-27
IGHA2	3.25965e-31	-1.4131	0.251	0.607	9.52894e-27
DCUN1D3	4.15751e-31	-1.60743	0.08	0.372	1.21536e-26
CCDC178	4.79524e-31	-1.62931	0.107	0.432	1.40179e-26
CYSLTR1	7.42994e-31	-1.47637	0.188	0.579	2.17199e-26
RPLP1	1.44253e-30	-0.509714	0.996	1	4.21695e-26
WFDC2	1.6713e-30	4.06875	0.551	0.115	4.88572e-26
LAPTM4B	2.67669e-30	-1.3644	0.354	0.787	7.82477e-26
PDK4	2.75745e-30	2.35761	0.771	0.536	8.06086e-26
IGHG1	2.94291e-30	1.13097	0.11	0.421	8.60301e-26
EIF1AY	2.94676e-30	-1.74004	0.035	0.246	8.61426e-26
KCTD8	7.78655e-30	-6.38352	0	0.077	2.27624e-25
TUBAL3	1.64716e-29	-4.86333	0.001	0.087	4.81515e-25
RPS2	2.24534e-29	-0.672228	0.995	1	6.56382e-25
ELOVL7	2.68182e-29	-1.41169	0.13	0.47	7.83975e-25
PITPNC1	3.28429e-29	-1.26446	0.259	0.689	9.60096e-25
BCL3	3.51659e-29	-1.35947	0.162	0.536	1.028e-24
COL17A1	3.66754e-29	-2.36284	0.038	0.246	1.07213e-24
ADAMTS9	3.70545e-29	-1.45891	0.346	0.765	1.08321e-24
GPM6A	4.29046e-29	2.24891	0.671	0.284	1.25423e-24
GJA1	6.18119e-29	-1.07547	0.26	0.689	1.80695e-24
ADAMTS4	8.33842e-29	-1.51525	0.058	0.301	2.43757e-24
FAM89A	8.87131e-29	-1.40429	0.144	0.492	2.59335e-24
FOXF1	1.18596e-28	-2.07679	0.041	0.251	3.46691e-24
PNP	1.31976e-28	-1.4841	0.201	0.574	3.85805e-24
NME2	1.32955e-28	-0.681956	0.895	0.989	3.88667e-24
EEF1G	2.32282e-28	-0.593854	0.948	1	6.79029e-24
RPL28	3.76839e-28	-0.545339	0.988	1	1.10161e-23
LTF	4.01238e-28	4.42485	0.503	0.082	1.17294e-23
GAS7	4.16313e-28	-2.27932	0.023	0.191	1.21701e-23
FABP4	4.76005e-28	4.62878	0.481	0.044	1.39151e-23
IGKV3-11	5.47307e-28	-3.49138	0.005	0.109	1.59994e-23
RPL18A	5.77772e-28	-0.585236	0.982	1	1.689e-23
RP1	7.15898e-28	-1.78895	0.039	0.246	2.09278e-23
LRRC8D	7.84569e-28	-1.42568	0.072	0.333	2.29353e-23
PKIG	7.95856e-28	-1.04582	0.291	0.738	2.32653e-23
ITM2A	8.77474e-28	1.61554	0.853	0.803	2.56512e-23
CH25H	8.89478e-28	-2.15484	0.116	0.421	2.60021e-23
TLE3	1.17303e-27	-1.34576	0.121	0.443	3.42911e-23
ANGEL1	1.24583e-27	-1.69903	0.077	0.339	3.64195e-23
NATD1	1.61462e-27	-2.01327	0.044	0.257	4.72003e-23
CISH	1.67991e-27	-2.57839	0.015	0.158	4.91088e-23
MTRNR2L12	3.13098e-27	1.09491	0.966	0.863	9.1528e-23
CASP3	4.31004e-27	-1.1443	0.183	0.563	1.25995e-22
NECTIN2	4.32372e-27	-1.01652	0.494	0.858	1.26395e-22
PDLIM1	5.07997e-27	-1.02913	0.753	0.984	1.48503e-22
RPL6	6.63134e-27	-0.545572	0.98	1	1.93854e-22
DUSP23	7.23366e-27	-1.08442	0.573	0.902	2.11462e-22
PIGR	7.68402e-27	4.33201	0.493	0.087	2.24627e-22
ABLIM2	8.17632e-27	-2.26239	0.028	0.202	2.39018e-22
SAMD4A	8.59798e-27	-1.70956	0.059	0.295	2.51345e-22
NLGN4Y	1.00808e-26	-2.77845	0.005	0.109	2.94692e-22
HLA-E	1.25048e-26	0.541429	0.995	1	3.65551e-22
CFI	1.57606e-26	-1.01319	0.533	0.902	4.60731e-22
SELENOW	1.61747e-26	-1.00251	0.765	0.973	4.72836e-22
AC020656.1	1.72075e-26	5.88717	0.434	0.016	5.03026e-22
EEF1B2	1.86044e-26	-0.750454	0.905	0.995	5.43862e-22
FSTL1	1.94382e-26	-1.34231	0.332	0.732	5.68236e-22
ABL2	2.11733e-26	-1.38876	0.306	0.716	6.18958e-22
NOVA1	2.41557e-26	-2.01016	0.087	0.344	7.06142e-22
AL583785.1	3.50423e-26	-2.05574	0.081	0.339	1.02439e-21
AKAP12	3.86805e-26	3.48655	0.559	0.186	1.13075e-21
TBC1D1	4.58471e-26	-0.937247	0.237	0.65	1.34025e-21
ARL4C	4.62309e-26	-1.4487	0.095	0.377	1.35147e-21
SBNO2	4.83493e-26	-1.11668	0.168	0.53	1.41339e-21
UGCG	4.97728e-26	-1.41373	0.364	0.738	1.45501e-21
ENO1	5.62474e-26	-0.979108	0.652	0.929	1.64428e-21
RALB	6.5853e-26	-1.09826	0.402	0.814	1.92508e-21
PIP	7.84851e-26	6.84798	0.414	0.005	2.29435e-21
PLAAT1	1.03258e-25	-4.27769	0.002	0.082	3.01853e-21
AC083855.2	1.114e-25	-2.13738	0.026	0.191	3.25656e-21
KDM5D	1.22179e-25	-1.98209	0.024	0.186	3.57167e-21
SPRED3	1.27765e-25	-2.8242	0.006	0.109	3.73496e-21
HSPB8	1.34017e-25	-2.15745	0.046	0.251	3.91772e-21
PCDH17	1.53834e-25	-1.49534	0.436	0.781	4.49703e-21
AC093515.1	1.6076e-25	-5.04764	0.001	0.071	4.69949e-21
TPT1	1.71174e-25	-0.524059	0.998	1	5.00393e-21
FAP	1.73936e-25	-1.85491	0.034	0.219	5.08466e-21
ZBTB16	1.74972e-25	2.25039	0.655	0.361	5.11495e-21
MCUR1	1.8475e-25	-1.1409	0.271	0.672	5.4008e-21
SRGN	2.33911e-25	-0.974952	0.712	0.962	6.83793e-21
MT-ND6	2.36749e-25	-1.00625	0.548	0.94	6.92087e-21
EVL	2.38101e-25	-1.19882	0.302	0.699	6.9604e-21
NUDT5	2.69763e-25	-1.20872	0.253	0.661	7.88599e-21
SH3TC1	4.37859e-25	-1.49098	0.062	0.295	1.27999e-20
MT-ND2	5.79787e-25	0.544515	0.999	0.995	1.69489e-20
NME1	7.276e-25	-1.27982	0.234	0.607	2.12699e-20
SEMA3F	7.89085e-25	-1.27321	0.195	0.563	2.30673e-20
CCND2	1.23342e-24	-1.14005	0.227	0.612	3.60565e-20
CSF2RB	1.236e-24	-1.237	0.132	0.443	3.61321e-20
EHD3	1.24113e-24	-2.29094	0.038	0.224	3.62819e-20
BAK1	1.26815e-24	-1.59686	0.062	0.29	3.70717e-20
AC069277.1	1.39991e-24	-3.01435	0.007	0.109	4.09236e-20
TES	1.41502e-24	-1.15315	0.226	0.612	4.13653e-20
ARPC5L	1.46179e-24	-1.16921	0.296	0.683	4.27324e-20
ASRGL1	1.50641e-24	-1.68155	0.083	0.339	4.40368e-20
SERPINB4	1.68696e-24	-2.59103	0.003	0.087	4.93149e-20
DYSF	2.07785e-24	-1.24888	0.18	0.53	6.07419e-20
THBS1	2.09e-24	-1.23106	0.258	0.639	6.1097e-20
BTG1	2.45345e-24	0.96923	0.94	0.967	7.17218e-20
DGKD	2.77739e-24	-2.06471	0.051	0.257	8.11914e-20
TMEM54	2.8245e-24	-1.44687	0.136	0.443	8.25687e-20
PPP1R14B	3.17068e-24	-0.96682	0.485	0.874	9.26883e-20
NUAK1	3.68143e-24	-1.0466	0.682	0.929	1.07619e-19
POSTN	3.81541e-24	-1.09605	0.642	0.907	1.11536e-19
IGLC1	3.97471e-24	0.589721	0.188	0.552	1.16193e-19
PXDN	4.11741e-24	-1.32577	0.106	0.388	1.20364e-19
LEF1	4.56609e-24	-1.51984	0.154	0.475	1.3348e-19
COMMD7	5.70144e-24	-0.907569	0.435	0.825	1.6667e-19
TUBB6	8.48867e-24	-1.10873	0.317	0.71	2.48149e-19
BAG3	8.60944e-24	-1.09047	0.212	0.585	2.5168e-19
RPL15	9.53454e-24	-0.498337	0.983	1	2.78723e-19
CFL1	9.6448e-24	-0.685002	0.856	0.989	2.81946e-19
IGKV3-20	1.25901e-23	-2.48545	0.007	0.109	3.68046e-19
AHNAK	1.28502e-23	0.786642	0.955	0.984	3.75651e-19
SLC25A6	1.29931e-23	-0.701535	0.792	0.989	3.79827e-19
ISOC2	1.39929e-23	-1.13814	0.184	0.536	4.09055e-19
GNG10	1.87117e-23	-0.977643	0.458	0.809	5.46999e-19
CARHSP1	2.25727e-23	-1.19891	0.33	0.727	6.59867e-19
C15orf39	2.26403e-23	-2.00293	0.032	0.202	6.61843e-19
SPP1	2.59919e-23	-2.99278	0.051	0.251	7.59822e-19
MT-ND4L	3.75133e-23	1.00246	0.948	0.978	1.09663e-18
SEC61B	3.90007e-23	-0.818262	0.671	0.956	1.14011e-18
RDX	4.00857e-23	-0.964068	0.824	0.973	1.17183e-18
FAM241A	4.53287e-23	-0.954799	0.439	0.858	1.3251e-18
SELP	4.57908e-23	-1.31814	0.458	0.76	1.3386e-18
ZNF593	4.61357e-23	-1.09028	0.159	0.492	1.34868e-18
TXNIP	5.19387e-23	0.777356	0.983	0.978	1.51832e-18
CFH	5.29723e-23	-1.24469	0.633	0.923	1.54854e-18
NACC2	5.8925e-23	-1.05988	0.127	0.432	1.72256e-18
KCNB1	6.4436e-23	-1.59633	0.075	0.311	1.88366e-18
KIFC3	9.15633e-23	-0.958427	0.236	0.628	2.67667e-18
EPHX4	9.68415e-23	-2.29572	0.032	0.197	2.83097e-18
CMIP	1.06479e-22	-0.918419	0.543	0.88	3.11269e-18
PLEKHB2	1.12816e-22	-0.928969	0.22	0.596	3.29796e-18
SLC25A25	1.33402e-22	-1.13339	0.224	0.579	3.89974e-18
PGF	1.85012e-22	-2.11644	0.045	0.235	5.40846e-18
ADRA2C	1.90857e-22	-2.36725	0.02	0.158	5.57932e-18
AGAP2-AS1	1.95678e-22	-1.29314	0.066	0.29	5.72025e-18
TUBA1C	2.39026e-22	-1.15411	0.153	0.47	6.98745e-18
ATP1B3	2.63354e-22	-0.958311	0.527	0.88	7.69863e-18
FGF1	3.25256e-22	-4.53823	0.002	0.077	9.50821e-18
CCDC85C	7.14239e-22	-1.35741	0.095	0.35	2.08793e-17
RBP7	8.24833e-22	1.76856	0.747	0.601	2.41124e-17
CERCAM	8.48894e-22	-1.89019	0.074	0.301	2.48157e-17
RCN1	9.08892e-22	-0.882651	0.516	0.88	2.65697e-17
HAGLROS	9.52075e-22	-1.77637	0.037	0.208	2.7832e-17
AC025614.2	9.79496e-22	-2.65501	0.015	0.137	2.86336e-17
SLC6A3	9.85836e-22	-6.52671	0	0.055	2.88189e-17
NRP2	1.37184e-21	1.90981	0.703	0.503	4.01031e-17
CLEC3B	1.44764e-21	3.6077	0.476	0.142	4.23189e-17
NRARP	1.49335e-21	-1.03195	0.25	0.623	4.36551e-17
RPL3	1.57753e-21	-0.50023	0.996	1	4.61159e-17
RPL27	1.68653e-21	-0.517677	0.936	1	4.93024e-17
RAB32	1.70233e-21	-1.16352	0.132	0.426	4.97643e-17
MANF	1.7088e-21	-1.20623	0.303	0.667	4.99535e-17
LYST	1.79321e-21	1.7356	0.74	0.607	5.24209e-17
CHN1	1.85293e-21	-1.15866	0.174	0.497	5.41667e-17
RPL41	2.41114e-21	-0.4139	0.996	1	7.0485e-17
BOP1	3.04798e-21	-1.4063	0.067	0.284	8.91016e-17
TRPM6	3.1958e-21	-1.66971	0.037	0.208	9.34227e-17
RPL4	3.23027e-21	-0.541495	0.922	0.995	9.44304e-17
TMC6	3.75076e-21	-1.31554	0.113	0.383	1.09646e-16
MSX1	4.55136e-21	-1.95713	0.057	0.257	1.3305e-16
APEX2	4.86675e-21	-1.17569	0.086	0.328	1.4227e-16
TGIF2	5.80702e-21	-1.39718	0.088	0.328	1.69757e-16
CCDC85B	6.73564e-21	-0.655442	0.828	0.978	1.96903e-16
PLVAP	7.34234e-21	-0.822859	0.754	0.945	2.14639e-16
ZBED1	7.71316e-21	-1.31685	0.133	0.415	2.25479e-16
PDE1C	8.76409e-21	-2.55306	0.003	0.077	2.56201e-16
TKT	8.9172e-21	-0.948918	0.402	0.781	2.60676e-16
AFAP1	9.04884e-21	-0.988242	0.225	0.579	2.64525e-16
NPDC1	9.05349e-21	-0.622638	0.897	0.978	2.64661e-16
SOX18	9.27146e-21	-1.04224	0.594	0.891	2.71032e-16
PARVB	9.69109e-21	-0.843082	0.297	0.694	2.833e-16
ADA	1.10603e-20	-1.96732	0.033	0.191	3.23327e-16
BSG	1.16212e-20	-0.886938	0.592	0.918	3.39723e-16
PABPC1	1.21103e-20	-0.640473	0.843	0.995	3.54021e-16
CAPS	1.27579e-20	4.93784	0.442	0.109	3.72952e-16
BHLHE40	1.36306e-20	-0.951569	0.323	0.716	3.98465e-16
HIF1A	1.6414e-20	-1.1642	0.324	0.672	4.7983e-16
MAFB	1.72827e-20	2.64048	0.507	0.153	5.05225e-16
SAMD1	1.75788e-20	-1.1364	0.174	0.492	5.13881e-16
PPA1	1.92108e-20	-0.734285	0.427	0.825	5.61588e-16
RPL7A	1.93502e-20	-0.505946	0.983	1	5.65664e-16
ABRACL	2.10154e-20	-0.92894	0.145	0.443	6.14345e-16
ICAM2	3.45069e-20	-0.754007	0.399	0.82	1.00874e-15
NUP93	3.55116e-20	-0.899089	0.116	0.388	1.03811e-15
FNDC4	4.17871e-20	-1.77249	0.062	0.262	1.22156e-15
MEOX1	4.19754e-20	-1.10148	0.345	0.694	1.22707e-15
RPL7	4.45973e-20	-0.507954	0.963	1	1.30371e-15
SCGB3A1	4.64303e-20	6.30959	0.355	0.016	1.3573e-15
RAN	4.65584e-20	-0.820535	0.613	0.907	1.36104e-15
HIF3A	5.90963e-20	3.41478	0.436	0.098	1.72756e-15
VAT1L	6.11922e-20	-4.91162	0.002	0.066	1.78883e-15
SIPA1L2	6.98991e-20	-1.88988	0.06	0.257	2.04336e-15
DDIT4	1.06108e-19	1.34503	0.806	0.699	3.10184e-15
IFITM3	1.08445e-19	-0.475281	0.949	0.995	3.17017e-15
TTC23L	1.59291e-19	-3.01181	0.009	0.104	4.65655e-15
RASA4	1.60961e-19	-1.15227	0.19	0.503	4.70538e-15
RBPMS	1.7048e-19	-0.929313	0.366	0.738	4.98364e-15
SYNJ2	1.87995e-19	-1.57545	0.106	0.35	5.49566e-15
MAP3K21	1.88761e-19	-2.67575	0.008	0.098	5.51804e-15
KLHL18	2.18507e-19	-1.20824	0.077	0.295	6.38762e-15
MMP15	2.298e-19	-0.887758	0.122	0.393	6.71775e-15
SHMT2	2.31315e-19	-1.2805	0.067	0.273	6.76205e-15
SNHG16	2.36517e-19	-0.835586	0.424	0.787	6.9141e-15
DGAT1	2.48834e-19	-0.892023	0.16	0.464	7.27417e-15
LPCAT1	2.53242e-19	-0.857738	0.136	0.421	7.40302e-15
FKBP5	2.78331e-19	2.59037	0.574	0.322	8.13645e-15
PTMA	3.05825e-19	-0.397712	0.992	1	8.94018e-15
NUPR1	3.08677e-19	1.95162	0.601	0.328	9.02356e-15
LY6H	3.19501e-19	-1.96785	0.028	0.169	9.33996e-15
DHRS7B	3.33656e-19	-1.04024	0.177	0.497	9.75376e-15
PKN3	3.74941e-19	-0.67092	0.191	0.525	1.09607e-14
RNASEK	4.15287e-19	-0.613303	0.77	0.978	1.21401e-14
COBLL1	4.21699e-19	-0.991829	0.157	0.454	1.23275e-14
RPS16	4.621e-19	-0.438744	0.971	1	1.35086e-14
RPL26	5.65545e-19	-0.446547	0.987	1	1.65326e-14
BMP1	5.91222e-19	-1.11971	0.091	0.322	1.72832e-14
TAGLN2	6.1532e-19	-0.62699	0.786	0.984	1.79876e-14
IGLC3	6.19117e-19	0.171401	0.298	0.656	1.80986e-14
C9orf40	7.3604e-19	-1.26689	0.098	0.333	2.15167e-14
RPL12	8.33756e-19	-0.47201	0.984	1	2.43732e-14
AVEN	9.17805e-19	-1.03235	0.092	0.328	2.68302e-14
CD99	9.95155e-19	-0.729077	0.726	0.956	2.90914e-14
ARID5A	1.07601e-18	-1.15065	0.129	0.393	3.1455e-14
RNF19B	1.08456e-18	-1.28433	0.096	0.328	3.17049e-14
EIF4A1	1.0851e-18	-0.541597	0.892	0.989	3.17208e-14
TSPAN13	1.16954e-18	-0.7612	0.234	0.585	3.41893e-14
TPM3	1.31128e-18	-0.581065	0.822	0.989	3.83328e-14
ARL6IP1	1.37607e-18	1.24716	0.776	0.76	4.02265e-14
PRSS23	1.38821e-18	1.69587	0.704	0.557	4.05814e-14
DNMT3B	1.40061e-18	-1.4513	0.042	0.208	4.09441e-14
MFNG	1.43578e-18	-0.875102	0.257	0.617	4.1972e-14
ARHGAP45	1.43651e-18	-1.75401	0.031	0.175	4.19936e-14
TRAF7	1.72208e-18	-0.907798	0.211	0.546	5.03416e-14
R3HDM4	1.8876e-18	-1.10186	0.118	0.377	5.51803e-14
PDE4B	2.00624e-18	-0.918175	0.133	0.404	5.86484e-14
MIR99AHG	2.04509e-18	1.80747	0.639	0.388	5.97842e-14
SERPINH1	2.10363e-18	-0.899115	0.4	0.781	6.14953e-14
RND1	2.45613e-18	-1.73804	0.069	0.268	7.18e-14
MYO5A	3.02397e-18	-0.684303	0.174	0.481	8.83998e-14
MGLL	3.21263e-18	-0.787123	0.591	0.934	9.39149e-14
BZW2	3.38413e-18	-0.924949	0.23	0.563	9.89283e-14
SEC14L1	3.44185e-18	-0.727756	0.674	0.934	1.00616e-13
FN1	3.48593e-18	1.0587	0.536	0.202	1.01904e-13
ARHGEF28	3.5471e-18	-0.777489	0.288	0.656	1.03692e-13
TTTY14	3.58698e-18	-1.3107	0.02	0.142	1.04858e-13
RPL17	4.33369e-18	-0.442599	0.986	1	1.26687e-13
PRDM1	4.66821e-18	-0.830435	0.095	0.328	1.36466e-13
RASSF2	4.70827e-18	-2.18689	0.014	0.12	1.37637e-13
AC104695.4	4.72728e-18	-0.712441	0.209	0.541	1.38193e-13
TAX1BP3	4.92129e-18	-0.703807	0.29	0.667	1.43864e-13
TMTC1	5.18078e-18	-0.996255	0.422	0.749	1.5145e-13
TMEM184B	5.41271e-18	-0.989409	0.212	0.536	1.5823e-13
GINS2	5.57904e-18	-4.52847	0.002	0.06	1.63092e-13
RCC1	6.03546e-18	-1.27088	0.054	0.235	1.76434e-13
RPS3	6.12123e-18	-0.482372	0.983	1	1.78942e-13
IVNS1ABP	6.1427e-18	-1.05585	0.301	0.628	1.79569e-13
LDHB	6.2173e-18	-0.877823	0.533	0.842	1.8175e-13
ARPC1B	6.50625e-18	-0.611067	0.761	0.951	1.90197e-13
UTRN	6.56853e-18	1.02342	0.856	0.842	1.92018e-13
FXYD6	6.76231e-18	3.73556	0.368	0.049	1.97683e-13
SERBP1	7.05968e-18	-0.514314	0.86	0.995	2.06376e-13
EMILIN2	7.09087e-18	-1.22215	0.076	0.284	2.07287e-13
VASP	7.26521e-18	-0.872242	0.282	0.645	2.12384e-13
PSMB5	7.28021e-18	-0.797247	0.47	0.842	2.12822e-13
DPP7	7.47837e-18	-0.709575	0.378	0.792	2.18615e-13
HLA-DMA	8.31438e-18	-0.680283	0.627	0.929	2.43054e-13
CNN2	8.43761e-18	-1.08402	0.135	0.399	2.46657e-13
NFKB2	8.64516e-18	-0.850339	0.179	0.481	2.52724e-13
DHRS4	9.23701e-18	-1.31823	0.097	0.322	2.70026e-13
ABCD4	9.66758e-18	-0.725061	0.375	0.776	2.82612e-13
HLX	1.06812e-17	-1.0928	0.084	0.301	3.12245e-13
GIPC3	1.22503e-17	-1.0613	0.07	0.268	3.58112e-13
CPXM2	1.24519e-17	-0.795654	0.414	0.787	3.64008e-13
RPL10A	1.49248e-17	-0.466775	0.98	1	4.36296e-13
PLEKHF1	1.59218e-17	-0.901341	0.066	0.262	4.65443e-13
RPS12	1.63613e-17	-0.413838	0.992	1	4.7829e-13
SPARCL1	1.76624e-17	0.562188	0.99	0.995	5.16326e-13
GIMAP7	2.25117e-17	0.823974	0.906	0.918	6.58084e-13
ERO1A	2.40426e-17	-0.729635	0.159	0.454	7.02839e-13
SNHG20	2.55136e-17	-0.806236	0.108	0.35	7.45839e-13
IL27RA	2.78368e-17	-1.02386	0.11	0.35	8.13753e-13
TTYH3	2.82185e-17	-1.109	0.072	0.273	8.2491e-13
VPS53	2.92606e-17	-0.824862	0.202	0.514	8.55376e-13
MTHFD1L	3.17208e-17	-1.30248	0.066	0.257	9.27293e-13
SNHG26	3.20529e-17	-1.15606	0.061	0.246	9.37003e-13
OST4	3.24332e-17	-0.556579	0.748	0.956	9.48119e-13
SRF	3.40351e-17	-1.14583	0.096	0.322	9.94948e-13
ASS1	3.42054e-17	-1.01725	0.183	0.475	9.99927e-13
BCKDK	3.53681e-17	-0.873529	0.174	0.47	1.03392e-12
GTF3C6	3.80788e-17	-0.769834	0.285	0.639	1.11316e-12
YPEL2	3.8371e-17	-0.776657	0.316	0.683	1.1217e-12
TSPAN15	4.34857e-17	-1.11681	0.098	0.322	1.27122e-12
ARNTL2	4.54331e-17	-1.67493	0.048	0.213	1.32815e-12
CIITA	4.65025e-17	-0.943494	0.248	0.574	1.35941e-12
ETS2	4.95926e-17	-0.658474	0.758	0.951	1.44974e-12
RAB13	5.06671e-17	-0.727829	0.674	0.945	1.48115e-12
NR2F2	6.3419e-17	1.03905	0.819	0.77	1.85393e-12
C7	7.20037e-17	2.72417	0.466	0.164	2.10488e-12
RPSA	8.37066e-17	-0.460428	0.949	0.995	2.447e-12
GPM6B	8.42984e-17	-1.15769	0.053	0.224	2.46429e-12
TMEM8A	9.92152e-17	-0.931108	0.115	0.355	2.90036e-12
JUN	1.02548e-16	1.14902	0.859	0.891	2.99778e-12
AQP1	1.08056e-16	-0.690205	0.927	0.951	3.1588e-12
DESI1	1.09912e-16	-0.889771	0.148	0.421	3.21305e-12
JAG2	1.14508e-16	-0.975229	0.224	0.53	3.34742e-12
SLC2A6	1.14878e-16	-1.74873	0.025	0.148	3.35823e-12
TMEM70	1.3686e-16	-0.772384	0.243	0.574	4.00082e-12
KPNA2	1.39971e-16	-0.952797	0.107	0.339	4.09177e-12
VASH1-AS1	1.46035e-16	-1.45389	0.062	0.24	4.26904e-12
GNA14	1.46069e-16	-1.13795	0.117	0.355	4.27003e-12
PPFIA3	1.5301e-16	-1.04674	0.096	0.317	4.47295e-12
HLA-DMB	1.61348e-16	-0.732083	0.291	0.645	4.71668e-12
SRM	1.74209e-16	-0.90331	0.313	0.645	5.09265e-12
MAPK12	1.84737e-16	-1.12889	0.133	0.383	5.40043e-12
MT-ND5	1.88272e-16	0.522164	0.989	1	5.50374e-12
RPS8	1.94656e-16	-0.403073	0.986	1	5.69037e-12
COL4A1	1.97671e-16	-0.700507	0.431	0.787	5.77851e-12
SIK1	1.98678e-16	-2.58399	0.005	0.077	5.80796e-12
INSR	2.10251e-16	-1.46089	0.317	0.623	6.14628e-12
MYC	2.14165e-16	-0.77953	0.388	0.727	6.2607e-12
GCNT2	2.32798e-16	-1.00258	0.184	0.47	6.80539e-12
UQCRFS1	2.37807e-16	-0.748165	0.348	0.727	6.95182e-12
COL4A2	2.91421e-16	-0.808916	0.446	0.781	8.5191e-12
FOSL2	2.95139e-16	-0.790863	0.404	0.765	8.62781e-12
MLXIP	2.95329e-16	-0.758636	0.369	0.721	8.63334e-12
PPIA	3.04664e-16	-0.510522	0.883	0.989	8.90625e-12
SEMA3A	3.0605e-16	-0.992446	0.134	0.383	8.94676e-12
SEMA4C	3.21039e-16	-0.866842	0.16	0.437	9.38495e-12
A2M	3.23587e-16	-0.533803	0.967	1	9.45942e-12
PRMT1	3.27802e-16	-0.6951	0.496	0.831	9.58263e-12
PNPLA6	3.3613e-16	-0.775428	0.14	0.404	9.82607e-12
METTL7A	3.60937e-16	1.57492	0.643	0.432	1.05513e-11
MARS	3.63862e-16	-0.861819	0.107	0.339	1.06368e-11
TNFAIP1	3.718e-16	-0.807342	0.303	0.656	1.08688e-11
AGPAT5	3.91919e-16	-0.850497	0.172	0.454	1.1457e-11
PTDSS1	3.9253e-16	-0.723606	0.155	0.426	1.14748e-11
SDF2L1	4.22964e-16	-0.886044	0.19	0.481	1.23645e-11
IGF2BP2	4.27591e-16	-0.638794	0.154	0.432	1.24998e-11
P4HB	4.30588e-16	-0.618777	0.518	0.891	1.25874e-11
RIN3	4.72444e-16	-1.28671	0.068	0.251	1.3811e-11
RPL39	4.95942e-16	-0.39152	0.978	1	1.44979e-11
TEAD4	5.36558e-16	-1.22198	0.086	0.29	1.56852e-11
TRAM2	5.42583e-16	-0.83178	0.153	0.421	1.58613e-11
PERP	5.57537e-16	1.84157	0.586	0.372	1.62985e-11
UBE2F	5.96727e-16	-0.870071	0.119	0.361	1.74441e-11
EIF5A	6.14084e-16	-0.730046	0.436	0.781	1.79515e-11
UPP1	6.16424e-16	-0.928434	0.269	0.59	1.80199e-11
MRPL12	6.41106e-16	-0.732149	0.185	0.481	1.87415e-11
LYRM4	6.64966e-16	-0.844023	0.196	0.497	1.9439e-11
PRRX2	6.76634e-16	-1.92053	0.034	0.169	1.978e-11
SCARA3	7.14439e-16	3.40127	0.371	0.087	2.08852e-11
CDC123	7.23911e-16	-0.981335	0.264	0.568	2.11621e-11
DOLK	7.27391e-16	-0.799775	0.095	0.311	2.12638e-11
PPP1R18	7.52256e-16	-0.888099	0.233	0.536	2.19907e-11
IFI44L	7.6278e-16	1.95726	0.67	0.541	2.22983e-11
NIBAN2	7.68034e-16	-0.616349	0.331	0.716	2.24519e-11
RPL13	7.82112e-16	-0.361951	0.997	1	2.28635e-11
APCDD1	8.0329e-16	-1.66731	0.099	0.306	2.34826e-11
PFDN4	8.06041e-16	-0.79865	0.262	0.59	2.3563e-11
NDRG1	8.58198e-16	-0.639543	0.741	0.967	2.50877e-11
DOT1L	8.82133e-16	-1.04467	0.048	0.208	2.57874e-11
SRARP	9.7199e-16	-3.75637	0.005	0.071	2.84142e-11
GLT8D2	9.79315e-16	-0.978941	0.103	0.322	2.86283e-11
MMD	9.89263e-16	-1.55649	0.045	0.197	2.89191e-11
C6orf58	9.91438e-16	6.23731	0.279	0.005	2.89827e-11
RNF145	1.00273e-15	-0.785178	0.332	0.699	2.93128e-11
IL15	1.03164e-15	-0.741073	0.203	0.503	3.01579e-11
MSMB	1.03386e-15	5.12024	0.299	0.022	3.02229e-11
LINC02577	1.04523e-15	-4.99769	0.001	0.049	3.05551e-11
IFRD2	1.05242e-15	-0.880504	0.174	0.454	3.07655e-11
MRPL15	1.07093e-15	-0.797485	0.181	0.464	3.13064e-11
NOX4	1.08487e-15	-3.18829	0.005	0.071	3.1714e-11
AC002480.1	1.13237e-15	-3.95905	0.001	0.049	3.31026e-11
TNIP2	1.13567e-15	-0.679001	0.259	0.596	3.3199e-11
MT1X	1.17839e-15	2.65165	0.506	0.262	3.44478e-11
YBX3	1.21159e-15	-0.535804	0.853	0.973	3.54184e-11
CEBPD	1.28161e-15	1.00635	0.859	0.863	3.74654e-11
COL6A2	1.34799e-15	-0.969481	0.118	0.344	3.94059e-11
TSTA3	1.35155e-15	-0.853832	0.192	0.475	3.95098e-11
RPL13A	1.35989e-15	-0.357086	0.992	1	3.97536e-11
SECTM1	1.3806e-15	-1.39349	0.053	0.213	4.03591e-11
RPS19	1.40711e-15	-0.390362	0.985	1	4.11341e-11
AF131215.6	1.48463e-15	-2.68722	0.007	0.082	4.34002e-11
RPS7	1.5072e-15	-0.383665	0.977	0.995	4.40601e-11
FMO2	1.5803e-15	2.97192	0.374	0.082	4.6197e-11
ANKRD65	1.679e-15	-1.04735	0.129	0.366	4.90821e-11
COX5A	1.76293e-15	-0.626485	0.479	0.836	5.15357e-11
CCDC149	1.77455e-15	-0.809389	0.137	0.388	5.18753e-11
UBA52	1.80078e-15	-0.38094	0.954	1	5.26422e-11
ACLY	1.91315e-15	-0.9803	0.211	0.497	5.59271e-11
TNFAIP2	1.93631e-15	-0.882523	0.185	0.47	5.66041e-11
IRF1	2.04962e-15	-0.685811	0.501	0.825	5.99167e-11
CASP6	2.24774e-15	-0.889877	0.12	0.355	6.57081e-11
RRS1	2.30073e-15	-1.11904	0.082	0.279	6.72572e-11
LCORL	2.39008e-15	-0.670222	0.205	0.514	6.98691e-11
NOS3	2.48072e-15	-0.910838	0.219	0.519	7.2519e-11
FDCSP	2.82326e-15	4.6973	0.3	0.027	8.25323e-11
BTF3	2.82589e-15	-0.403421	0.928	0.995	8.26094e-11
GPR4	3.06526e-15	-1.21338	0.077	0.268	8.96067e-11
G0S2	3.36083e-15	-1.56112	0.025	0.142	9.8247e-11
TIMM13	4.01822e-15	-0.660608	0.363	0.732	1.17465e-10
TMSB10	4.35015e-15	-0.433621	0.986	1	1.27168e-10
SYNE1	4.47262e-15	1.86995	0.616	0.459	1.30748e-10
FAM110B	4.59908e-15	-1.67498	0.025	0.142	1.34445e-10
EFHD2	4.80255e-15	-0.806816	0.485	0.836	1.40393e-10
HSPA5	4.81187e-15	-0.776928	0.576	0.858	1.40665e-10
PSAP	5.043e-15	0.694697	0.88	0.929	1.47422e-10
CD79B	5.08985e-15	-0.714567	0.262	0.585	1.48792e-10
CDS2	5.21121e-15	-0.70234	0.259	0.596	1.52339e-10
CLTA	5.54122e-15	-0.595687	0.737	0.951	1.61986e-10
SMC6	5.69602e-15	-0.84412	0.208	0.503	1.66512e-10
CTSB	5.77364e-15	-1.00263	0.449	0.765	1.68781e-10
PAX8-AS1	6.10921e-15	-1.54881	0.061	0.23	1.7859e-10
VAMP5	6.12032e-15	-0.605023	0.744	0.934	1.78915e-10
TBCD	6.22679e-15	-0.744392	0.211	0.508	1.82028e-10
DUSP7	6.2453e-15	-0.85945	0.132	0.372	1.82569e-10
SNRK	6.36624e-15	-0.612824	0.606	0.929	1.86104e-10
EEF1E1	6.53258e-15	-0.761179	0.206	0.503	1.90967e-10
AZGP1	6.60433e-15	6.17239	0.267	0.005	1.93064e-10
NEK6	6.78442e-15	-0.912975	0.089	0.29	1.98329e-10
C4orf48	6.89925e-15	-0.871131	0.169	0.432	2.01686e-10
KLHL5	7.0741e-15	-0.691941	0.169	0.437	2.06797e-10
H2AFY	7.69826e-15	-0.553742	0.463	0.842	2.25043e-10
ST6GALNAC4	7.76234e-15	-0.67993	0.135	0.383	2.26916e-10
CRIP2	7.85395e-15	-0.517761	0.707	0.962	2.29594e-10
TSC22D3	7.9069e-15	1.0209	0.804	0.781	2.31143e-10
EIF3I	8.04511e-15	-0.723674	0.543	0.869	2.35183e-10
DEAF1	8.44013e-15	-0.804759	0.179	0.454	2.4673e-10
IRAK1	8.71593e-15	-0.689231	0.145	0.399	2.54793e-10
CYBC1	8.80131e-15	-0.722828	0.215	0.519	2.57289e-10
CPT1C	9.39398e-15	-1.64669	0.03	0.153	2.74614e-10
NDST1	9.46771e-15	-0.791571	0.265	0.585	2.7677e-10
PLXDC1	9.67392e-15	-1.0378	0.034	0.164	2.82798e-10
AL031595.3	9.88551e-15	-1.06225	0.059	0.224	2.88983e-10
ADAM15	9.93373e-15	-0.530125	0.701	0.962	2.90393e-10
MAD2L2	1.00537e-14	-0.732344	0.165	0.432	2.939e-10
GALNT14	1.00781e-14	-3.93356	0.002	0.055	2.94614e-10
TNFRSF10D	1.02864e-14	-0.535236	0.244	0.568	3.00703e-10
MARCKS	1.04977e-14	1.04862	0.822	0.798	3.06879e-10
LDLRAD3	1.05789e-14	-0.836985	0.135	0.377	3.09254e-10
LINC00324	1.08128e-14	-1.07148	0.067	0.24	3.16091e-10
KNOP1	1.15334e-14	-0.834141	0.25	0.557	3.37156e-10
SLCO4A1	1.17579e-14	-0.696232	0.092	0.295	3.43719e-10
ETHE1	1.22174e-14	-0.767397	0.215	0.508	3.57151e-10
YWHAH	1.2562e-14	-0.665725	0.428	0.776	3.67225e-10
ATP5F1E	1.27572e-14	-0.418386	0.929	1	3.72931e-10
TNFAIP8	1.28282e-14	-1.07612	0.099	0.306	3.75005e-10
USB1	1.29242e-14	-1.03338	0.074	0.257	3.77814e-10
CDYL2	1.32513e-14	-1.58387	0.032	0.158	3.87374e-10
H2AFZ	1.47199e-14	-0.742359	0.642	0.94	4.30306e-10
HOXD9	1.55667e-14	-1.21381	0.105	0.311	4.55061e-10
CITED2	1.56431e-14	-1.04001	0.238	0.53	4.57295e-10
RIN1	1.58358e-14	-1.28611	0.05	0.202	4.62929e-10
CLPP	1.61735e-14	-0.7316	0.263	0.585	4.72801e-10
ESR2	1.62329e-14	-2.51886	0.019	0.12	4.74538e-10
QARS	1.66678e-14	-0.661031	0.318	0.667	4.8725e-10
SLC2A3	1.67963e-14	-0.504375	0.567	0.896	4.91007e-10
TPGS1	1.75524e-14	-0.695209	0.266	0.59	5.1311e-10
AC004951.1	1.77991e-14	-0.85604	0.107	0.322	5.20321e-10
GRK5	1.79177e-14	-0.812267	0.181	0.448	5.23789e-10
TSSC4	1.80278e-14	-0.529687	0.253	0.596	5.27008e-10
CYTOR	1.86075e-14	-0.855108	0.176	0.443	5.43952e-10
SLC16A3	1.89888e-14	-1.0837	0.087	0.279	5.55101e-10
TIMMDC1	1.93732e-14	-0.623109	0.358	0.716	5.66337e-10
TNXB	1.97175e-14	-0.553901	0.399	0.754	5.76402e-10
ZNF749	2.06138e-14	-1.21728	0.047	0.197	6.02602e-10
CDH24	2.12591e-14	-0.782359	0.111	0.328	6.21468e-10
VWA1	2.15943e-14	-0.762505	0.429	0.749	6.31266e-10
AL445524.1	2.23257e-14	-1.02649	0.104	0.311	6.52647e-10
LAMC1	2.28404e-14	-0.634938	0.417	0.781	6.67693e-10
SYNE2	2.29602e-14	0.804585	0.899	0.945	6.71196e-10
ACKR1	2.44273e-14	-0.855091	0.657	0.836	7.14083e-10
SLC16A4	2.51753e-14	-0.803245	0.089	0.29	7.35951e-10
ARRDC3	2.54399e-14	-1.10823	0.205	0.47	7.43684e-10
RPS9	2.61267e-14	-0.36731	0.989	1	7.63761e-10
GPR137	2.65405e-14	-0.817918	0.11	0.328	7.75858e-10
ITGB3	2.72815e-14	-1.16719	0.05	0.202	7.9752e-10
RBP5	2.77656e-14	-0.84251	0.189	0.464	8.11673e-10
RNF7	2.83472e-14	-0.712172	0.575	0.88	8.28674e-10
PLAUR	2.86092e-14	-1.51377	0.07	0.24	8.36332e-10
CHFR	2.88447e-14	-0.866864	0.094	0.295	8.43217e-10
CAVIN3	2.94697e-14	-0.750495	0.424	0.749	8.61489e-10
IGHV4-59	3.01628e-14	-3.3369	0.004	0.06	8.8175e-10
ID1	3.06786e-14	1.26634	0.84	0.798	8.96827e-10
RPS6KA1	3.12319e-14	-1.63186	0.029	0.148	9.13003e-10
HLA-DPB1	3.49981e-14	-0.558311	0.828	0.978	1.0231e-09
MOB2	3.59811e-14	-0.744321	0.328	0.667	1.05183e-09
PRXL2B	3.72505e-14	-1.07327	0.114	0.328	1.08894e-09
PRR7	3.98737e-14	-0.842236	0.048	0.197	1.16563e-09
TUBG1	4.13428e-14	-0.720259	0.105	0.317	1.20857e-09
SYNGR2	4.15143e-14	-0.736007	0.431	0.77	1.21359e-09
KL	4.21999e-14	-1.48817	0.054	0.208	1.23363e-09
EPAS1	4.27373e-14	-0.476862	0.886	0.989	1.24934e-09
TMEM255B	4.3116e-14	-0.498622	0.33	0.678	1.26041e-09
SNTG2	4.31237e-14	-1.05215	0.118	0.333	1.26063e-09
HOXD10	4.44511e-14	-3.56189	0.005	0.066	1.29944e-09
HSD17B10	4.51215e-14	-0.590788	0.256	0.585	1.31904e-09
NET1	4.55244e-14	1.38912	0.67	0.541	1.33081e-09
UTP11	4.62044e-14	-0.707807	0.239	0.541	1.35069e-09
CALR	4.69055e-14	-0.610823	0.759	0.94	1.37119e-09
BX284668.5	4.70523e-14	-0.635441	0.118	0.344	1.37548e-09
IGLV1-44	4.75423e-14	-2.64259	0.007	0.077	1.3898e-09
GALNT15	4.98112e-14	3.97027	0.302	0.044	1.45613e-09
GASK1A	5.16087e-14	-1.88918	0.018	0.115	1.50868e-09
GRAMD1A	5.20543e-14	-0.692722	0.321	0.65	1.5217e-09
RPS28	5.48154e-14	-0.331339	0.989	1	1.60242e-09
ABCC5	5.53355e-14	-0.745347	0.098	0.301	1.61762e-09
EVA1B	5.57063e-14	-0.657195	0.361	0.71	1.62846e-09
EGR3	6.01637e-14	-0.780577	0.18	0.443	1.75877e-09
TCF15	6.14639e-14	-1.56691	0.074	0.246	1.79677e-09
TRADD	6.26332e-14	-0.677846	0.157	0.41	1.83096e-09
AMPD2	6.3223e-14	-1.26508	0.032	0.153	1.8482e-09
PIK3CG	6.41918e-14	-1.14287	0.054	0.208	1.87652e-09
RIOX2	6.68184e-14	-0.723154	0.196	0.47	1.9533e-09
RRP12	6.82219e-14	-1.01781	0.062	0.224	1.99433e-09
MCAM	6.99047e-14	-0.745784	0.434	0.721	2.04352e-09
POMP	6.99755e-14	-0.724458	0.656	0.918	2.04559e-09
HTATIP2	7.34837e-14	-0.64486	0.183	0.459	2.14815e-09
RARA	7.35981e-14	-0.58744	0.183	0.454	2.15149e-09
CDK2AP2	7.51802e-14	-0.907465	0.174	0.426	2.19774e-09
RPL22L1	7.6146e-14	-0.8115	0.395	0.716	2.22597e-09
FOSL1	8.05727e-14	-2.10276	0.013	0.098	2.35538e-09
IGHM	8.13789e-14	-0.927586	0.068	0.235	2.37895e-09
TGFBR3	8.14383e-14	1.20945	0.73	0.645	2.38069e-09
F11R	8.31152e-14	-0.56776	0.306	0.639	2.42971e-09
RPS26	9.08271e-14	0.514709	0.943	0.973	2.65515e-09
PPP1CA	9.264e-14	-0.695852	0.365	0.694	2.70815e-09
LINC01115	9.46285e-14	-4.21666	0.001	0.044	2.76628e-09
REXO2	9.56176e-14	-0.587967	0.417	0.792	2.79519e-09
EIF3L	9.62977e-14	-0.61082	0.595	0.896	2.81507e-09
ACVRL1	1.03306e-13	-0.631305	0.46	0.803	3.01993e-09
CFB	1.05965e-13	-0.672333	0.171	0.432	3.09768e-09
TWF2	1.06455e-13	-0.709361	0.251	0.557	3.11199e-09
SLC43A3	1.13295e-13	-0.653225	0.159	0.41	3.31194e-09
PPP1R9B	1.24203e-13	-0.781127	0.156	0.404	3.63083e-09
GRM2	1.25283e-13	-5.42339	0	0.033	3.66241e-09
CLEC10A	1.25283e-13	-5.46821	0	0.033	3.66241e-09
CCL13	1.25283e-13	-6.38896	0	0.033	3.66241e-09
CRTAC1	1.33982e-13	3.68093	0.306	0.049	3.91671e-09
MFAP3	1.36504e-13	-1.07995	0.071	0.24	3.99042e-09
MLEC	1.36791e-13	-0.83303	0.388	0.705	3.99882e-09
PKM	1.45826e-13	-0.660748	0.629	0.902	4.26292e-09
AL354836.1	1.46581e-13	-1.53739	0.032	0.153	4.285e-09
RACK1	1.49063e-13	-0.376578	0.969	1	4.35757e-09
COL3A1	1.50632e-13	2.91426	0.338	0.077	4.40342e-09
MIR22HG	1.50762e-13	-0.530464	0.242	0.557	4.40721e-09
DAB2IP	1.5326e-13	-0.83906	0.216	0.497	4.48026e-09
CYP4B1	1.53753e-13	5.00614	0.276	0.027	4.49467e-09
ST8SIA4	1.54192e-13	-0.569143	0.156	0.404	4.50749e-09
COA6	1.57055e-13	-0.630551	0.181	0.454	4.59118e-09
MUC5B	1.58084e-13	4.4326	0.263	0.016	4.62127e-09
SERPINA5	1.58359e-13	-2.27715	0.003	0.055	4.6293e-09
GLP1R	1.60681e-13	-5.63346	0.001	0.038	4.69719e-09
CDK2AP1	1.61855e-13	-0.852969	0.3	0.601	4.7315e-09
MARCH2	1.61927e-13	-0.557328	0.262	0.59	4.73361e-09
C11orf95	1.62546e-13	-0.976186	0.075	0.251	4.75169e-09
TMEM87B	1.66032e-13	-0.617122	0.248	0.552	4.85361e-09
SMAD1	1.69023e-13	-0.531349	0.526	0.88	4.94105e-09
MMRN1	1.69382e-13	1.37014	0.738	0.612	4.95154e-09
AC073254.1	1.70223e-13	-4.06278	0.001	0.038	4.97614e-09
KAZN	1.71158e-13	-0.495848	0.18	0.459	5.00345e-09
RYR2	1.73261e-13	-2.94558	0.016	0.104	5.06495e-09
HLA-DRA	1.75317e-13	-0.535055	0.901	0.989	5.12504e-09
APEH	1.764e-13	-0.894837	0.057	0.213	5.15669e-09
ZNF436	1.78478e-13	-0.934362	0.111	0.317	5.21744e-09
HPS6	1.8536e-13	-1.11339	0.05	0.197	5.41864e-09
RPP40	1.8647e-13	-1.24974	0.048	0.191	5.45107e-09
PLLP	1.8751e-13	-0.855207	0.11	0.317	5.48148e-09
ANGPTL2	1.88468e-13	-0.976827	0.092	0.284	5.50949e-09
RGS19	1.89149e-13	-0.790144	0.127	0.35	5.52939e-09
EDEM1	1.94532e-13	-0.872969	0.102	0.301	5.68677e-09
MRPL17	2.02448e-13	-0.7852	0.296	0.596	5.91817e-09
PCBD1	2.03016e-13	-0.646128	0.226	0.519	5.93477e-09
FLYWCH2	2.06968e-13	-0.605361	0.29	0.612	6.0503e-09
AL158206.1	2.15047e-13	-0.935127	0.132	0.355	6.28647e-09
TP53	2.42294e-13	-0.719052	0.217	0.503	7.08299e-09
H3F3A	2.48036e-13	-0.405412	0.964	1	7.25084e-09
PGM2	2.54601e-13	-0.756966	0.173	0.426	7.44276e-09
AGPS	2.8859e-13	-0.690372	0.144	0.383	8.43635e-09
CPNE5	3.03128e-13	-0.730701	0.079	0.257	8.86133e-09
ABO	3.10358e-13	-1.05047	0.066	0.23	9.0727e-09
HNRNPA1P48	3.16883e-13	-1.20659	0.064	0.224	9.26344e-09
HAUS1	3.18957e-13	-0.671089	0.156	0.404	9.32407e-09
ICAM1	3.26647e-13	-0.773102	0.231	0.519	9.54889e-09
SDHAF3	3.35526e-13	-0.677328	0.121	0.344	9.80842e-09
HSD3B7	3.44967e-13	-0.90881	0.102	0.301	1.00844e-08
ATP1A1	3.80824e-13	-0.573869	0.712	0.945	1.11326e-08
LAMTOR5	3.90162e-13	-0.60065	0.55	0.852	1.14056e-08
AC110611.1	3.90267e-13	-1.91222	0.034	0.153	1.14087e-08
KDM6B	3.92298e-13	-0.812277	0.25	0.536	1.1468e-08
LYPLA1	4.05042e-13	-0.676064	0.367	0.694	1.18406e-08
SH2B3	4.09933e-13	-0.616827	0.196	0.464	1.19836e-08
VCAM1	4.12933e-13	-0.823715	0.282	0.563	1.20713e-08
SLC25A39	4.31972e-13	-0.491147	0.235	0.536	1.26278e-08
C2CD4B	4.35931e-13	-1.2142	0.171	0.404	1.27436e-08
NRGN	4.60965e-13	-0.8096	0.175	0.421	1.34754e-08
ZPR1	4.80258e-13	-0.813145	0.166	0.41	1.40394e-08
UBALD2	4.86434e-13	-0.430745	0.299	0.639	1.42199e-08
PSMG1	4.87843e-13	-0.715272	0.171	0.426	1.42611e-08
EIF4EBP1	4.95188e-13	-1.01055	0.12	0.333	1.44758e-08
HNRNPA1	4.97813e-13	-0.468106	0.877	0.989	1.45526e-08
C1QTNF1	4.98647e-13	-0.71662	0.15	0.388	1.4577e-08
NACC1	5.01146e-13	-0.857379	0.085	0.268	1.465e-08
SNHG3	5.0585e-13	-0.937238	0.135	0.355	1.47875e-08
FAM219A	5.22141e-13	-0.53727	0.142	0.377	1.52637e-08
MCF2L	5.31516e-13	-0.698633	0.39	0.716	1.55378e-08
NARF	5.32759e-13	-0.58765	0.266	0.574	1.55742e-08
SLC25A3	5.41108e-13	-0.495328	0.838	0.984	1.58182e-08
HBEGF	5.43559e-13	-0.803858	0.258	0.53	1.58899e-08
IGHG2	5.61087e-13	-0.68137	0.029	0.142	1.64023e-08
ADGRL4	5.67128e-13	-0.453374	0.872	0.995	1.65789e-08
TMEM45A	5.72819e-13	-1.66635	0.013	0.093	1.67452e-08
BRMS1	5.7372e-13	-0.650472	0.192	0.459	1.67715e-08
CALCOCO2	5.92019e-13	1.20791	0.715	0.732	1.73065e-08
RPL9	5.98301e-13	-0.335279	0.989	1	1.74901e-08
PPP3R1	6.22089e-13	-0.546824	0.212	0.497	1.81855e-08
AC007920.2	6.36487e-13	-3.76694	0.002	0.049	1.86064e-08
CCDC188	6.39191e-13	-2.16196	0.01	0.082	1.86855e-08
TPM4	6.44412e-13	-0.493445	0.786	0.967	1.88381e-08
ZNF423	6.52938e-13	-0.888671	0.117	0.328	1.90874e-08
KRT19	6.66306e-13	3.01111	0.442	0.213	1.94781e-08
RFTN1	6.6675e-13	-0.561601	0.145	0.383	1.94911e-08
FAM43B	6.80128e-13	-3.26356	0.002	0.049	1.98822e-08
CISD2	7.0252e-13	-0.765171	0.129	0.35	2.05368e-08
VPS51	7.18139e-13	-0.675534	0.423	0.765	2.09934e-08
NME4	7.34626e-13	-0.625735	0.263	0.568	2.14753e-08
MYRIP	7.35338e-13	2.0077	0.464	0.235	2.14961e-08
ENPP2	7.39997e-13	-1.10325	0.129	0.339	2.16323e-08
CCL14	7.47365e-13	1.09811	0.879	0.874	2.18477e-08
MME	8.0049e-13	5.46576	0.275	0.038	2.34007e-08
PHF23	8.37138e-13	-0.7374	0.12	0.333	2.44721e-08
TOMM22	8.40965e-13	-0.581276	0.366	0.721	2.45839e-08
ZNF581	9.06274e-13	-0.679482	0.126	0.344	2.64931e-08
KCNJ15	9.60213e-13	-2.26804	0.011	0.087	2.80699e-08
POLR3H	1.01237e-12	-0.797074	0.078	0.251	2.95947e-08
PIK3C2B	1.01655e-12	-0.678456	0.266	0.552	2.97169e-08
LPCAT4	1.05073e-12	-0.774792	0.268	0.557	3.0716e-08
TCF4	1.05268e-12	-0.413107	0.932	0.984	3.07731e-08
PKP4	1.0685e-12	-0.617549	0.615	0.913	3.12355e-08
EHD2	1.07431e-12	-0.692959	0.42	0.749	3.14052e-08
PLOD1	1.07682e-12	-0.779438	0.106	0.306	3.14788e-08
DDX39A	1.08928e-12	-0.697751	0.171	0.421	3.18429e-08
CCZ1	1.10672e-12	-0.489176	0.213	0.497	3.23526e-08
TRAP1	1.15449e-12	-0.605784	0.189	0.448	3.37493e-08
MAOA	1.23084e-12	1.82682	0.527	0.344	3.59811e-08
SND1	1.28661e-12	-0.58856	0.236	0.53	3.76116e-08
ICAM3	1.31366e-12	-0.89854	0.138	0.361	3.84023e-08
ZNF787	1.3577e-12	-0.627074	0.211	0.486	3.96896e-08
SNHG15	1.38592e-12	-0.715991	0.191	0.448	4.05147e-08
AL135818.1	1.43321e-12	-3.16487	0.004	0.055	4.18971e-08
MAPK11	1.48516e-12	-0.660261	0.225	0.503	4.34157e-08
LMBR1L	1.51705e-12	-0.540177	0.199	0.475	4.43479e-08
SDSL	1.60811e-12	-1.71544	0.013	0.093	4.701e-08
HM13	1.61865e-12	-0.596419	0.372	0.738	4.73181e-08
ZNF281	1.64646e-12	-0.806917	0.229	0.492	4.8131e-08
ITPR3	1.73248e-12	-0.788553	0.172	0.41	5.06455e-08
ANO5	1.77831e-12	-2.29282	0.01	0.082	5.19853e-08
AC008050.1	1.80432e-12	-1.7766	0.019	0.109	5.27457e-08
KCNJ2-AS1	1.86723e-12	-3.01991	0.006	0.066	5.45848e-08
MAP2K3	1.87589e-12	-0.822142	0.145	0.366	5.4838e-08
LDLR	2.00733e-12	-0.784818	0.171	0.404	5.86804e-08
TTLL12	2.02536e-12	-1.08638	0.051	0.191	5.92074e-08
EHBP1L1	2.02544e-12	-0.511372	0.303	0.634	5.92098e-08
FAM114A2	2.04171e-12	-0.7374	0.183	0.437	5.96854e-08
VMP1	2.049e-12	-0.704849	0.428	0.732	5.98984e-08
VASH1	2.22147e-12	-0.672084	0.179	0.421	6.49404e-08
CBX4	2.25218e-12	-0.895581	0.139	0.355	6.58379e-08
TECPR2	2.30795e-12	-0.504523	0.126	0.344	6.74682e-08
KCNJ14	2.36025e-12	-1.36816	0.019	0.109	6.89973e-08
P2RY8	2.38548e-12	-1.5865	0.031	0.142	6.97348e-08
PIM3	2.42984e-12	-0.727401	0.551	0.825	7.10316e-08
MEX3C	2.53182e-12	-0.714307	0.174	0.415	7.40127e-08
JAM3	2.54141e-12	-0.550439	0.181	0.437	7.4293e-08
LASP1	2.56948e-12	-0.626235	0.285	0.601	7.51135e-08
ELOVL1	2.60049e-12	-0.556892	0.291	0.617	7.60201e-08
FES	2.60545e-12	-0.59781	0.188	0.443	7.61651e-08
RCC2	2.66094e-12	-0.557134	0.161	0.404	7.77872e-08
DMBT1	2.67166e-12	5.81315	0.226	0.005	7.81005e-08
AC007681.1	2.77655e-12	-1.39057	0.097	0.273	8.11668e-08
PLEKHG2	2.825e-12	-1.21763	0.062	0.213	8.25833e-08
AMD1	2.87122e-12	-0.679376	0.32	0.634	8.39343e-08
MDGA1	2.87333e-12	-2.45646	0.032	0.142	8.39959e-08
EMCN	2.91322e-12	0.805554	0.931	0.956	8.51622e-08
SPINT2	2.98502e-12	2.43092	0.37	0.126	8.72612e-08
ADSL	3.04016e-12	-0.528901	0.165	0.41	8.8873e-08
NTMT1	3.165e-12	-0.583102	0.171	0.415	9.25225e-08
ABI3	3.20388e-12	-0.488891	0.278	0.59	9.3659e-08
PFN1	3.22305e-12	-0.61664	0.719	0.94	9.42195e-08
RASGRF2	3.25577e-12	-0.58594	0.181	0.437	9.51758e-08
TRAF3	3.54363e-12	-0.91274	0.064	0.219	1.03591e-07
COMTD1	3.55334e-12	-0.786336	0.092	0.273	1.03875e-07
KARS	3.59035e-12	-0.54069	0.278	0.579	1.04957e-07
MAZ	3.60536e-12	-0.56417	0.33	0.645	1.05395e-07
NR2F1	3.66785e-12	3.23221	0.318	0.082	1.07222e-07
GJB2	3.68396e-12	-1.99156	0.019	0.109	1.07693e-07
KCNE1	3.69177e-12	-2.19235	0.009	0.077	1.07921e-07
RAPH1	3.76863e-12	1.945	0.484	0.284	1.10168e-07
RPL19	3.8646e-12	-0.34299	0.988	1	1.12974e-07
RPS17	4.0187e-12	-0.373041	0.917	1	1.17479e-07
ARID5B	4.03682e-12	-0.551839	0.463	0.792	1.18009e-07
VWF	4.13896e-12	0.761689	0.973	0.989	1.20994e-07
EEF1AKMT4	4.21649e-12	-2.02155	0.021	0.115	1.23261e-07
MCUB	4.33905e-12	-0.460873	0.272	0.59	1.26844e-07
HIGD2A	4.35724e-12	-0.552849	0.421	0.754	1.27375e-07
RPS3A	4.39037e-12	-0.349331	0.99	1	1.28344e-07
DGKA	4.41674e-12	-1.24385	0.074	0.235	1.29115e-07
TRNT1	4.44302e-12	-0.638051	0.186	0.437	1.29883e-07
SEMA6C	4.47023e-12	-0.690693	0.078	0.246	1.30678e-07
FAM124B	4.66836e-12	-0.692352	0.125	0.333	1.3647e-07
SMIM12	4.98517e-12	-0.500269	0.205	0.481	1.45732e-07
CTBP2	5.09639e-12	-0.739679	0.466	0.77	1.48983e-07
MVP	5.11121e-12	-0.406643	0.354	0.71	1.49416e-07
VSIR	5.16749e-12	-0.628256	0.422	0.721	1.51061e-07
NXN	5.38446e-12	-0.451027	0.302	0.634	1.57404e-07
SLC25A5	5.51424e-12	-0.619735	0.595	0.88	1.61198e-07
EIF3E	5.54608e-12	-0.436854	0.828	0.962	1.62128e-07
MYL6B	5.78364e-12	-0.561059	0.265	0.563	1.69073e-07
SH3BP2	5.80031e-12	-0.513903	0.318	0.634	1.69561e-07
DPP3	6.07592e-12	-0.748321	0.047	0.18	1.77617e-07
MIDN	6.16336e-12	-0.527616	0.443	0.754	1.80174e-07
IDH3A	6.33923e-12	-0.60209	0.103	0.295	1.85315e-07
FAM50A	6.34098e-12	-0.593947	0.262	0.552	1.85366e-07
SVIP	6.46463e-12	-0.696723	0.324	0.634	1.88981e-07
SAYSD1	6.56639e-12	-0.773309	0.121	0.322	1.91955e-07
HTR3B	6.61469e-12	-4.36065	0.003	0.049	1.93367e-07
TNFRSF10B	6.66992e-12	-0.589727	0.236	0.519	1.94982e-07
MYO1E	6.68835e-12	-0.634111	0.178	0.421	1.9552e-07
MRPS23	6.82395e-12	-0.459971	0.228	0.514	1.99485e-07
PTGS1	6.83551e-12	-1.66249	0.039	0.158	1.99823e-07
CDK9	7.07965e-12	-0.428183	0.265	0.574	2.06959e-07
DUSP26	7.3736e-12	-3.98406	0.003	0.049	2.15552e-07
CAV1	7.51658e-12	0.711566	0.947	0.929	2.19732e-07
PPARGC1B	7.55644e-12	-2.53804	0.014	0.093	2.20897e-07
RPS24	7.66931e-12	-0.308509	0.992	0.995	2.24197e-07
LINC01303	7.74706e-12	-4.21468	0.001	0.038	2.2647e-07
GNLY	7.93049e-12	-0.25506	0.023	0.12	2.31832e-07
EPOP	8.02215e-12	-2.41164	0.014	0.093	2.34512e-07
FENDRR	8.33854e-12	-1.6496	0.022	0.115	2.43761e-07
HEG1	8.45382e-12	-0.677063	0.702	0.945	2.4713e-07
PYCARD	8.55396e-12	-0.740369	0.281	0.557	2.50058e-07
MZB1	8.67204e-12	-1.42682	0.03	0.137	2.5351e-07
FAM155B	8.72939e-12	-1.84287	0.013	0.087	2.55186e-07
AKR1C1	9.05397e-12	3.2536	0.284	0.055	2.64675e-07
TRIR	9.22323e-12	-0.477076	0.741	0.967	2.69623e-07
ACTG1	9.24813e-12	-0.429361	0.972	0.995	2.70351e-07
TFPI	9.83103e-12	1.2334	0.735	0.672	2.8739e-07
LAP3	1.02064e-11	-0.500785	0.615	0.913	2.98363e-07
PPIB	1.05208e-11	-0.561239	0.73	0.902	3.07554e-07
SMOX	1.08774e-11	-1.07719	0.056	0.197	3.17978e-07
TIFA	1.12624e-11	-0.759247	0.092	0.268	3.29235e-07
PSME4	1.13696e-11	-0.701743	0.133	0.344	3.32367e-07
AFF3	1.151e-11	-3.42617	0.004	0.055	3.36473e-07
ATOH8	1.16107e-11	-0.750892	0.256	0.525	3.39416e-07
RFX5	1.18971e-11	-0.737348	0.112	0.306	3.47789e-07
C1QBP	1.18975e-11	-0.65047	0.497	0.781	3.478e-07
CMC4	1.21742e-11	-0.627086	0.163	0.399	3.55889e-07
EIF3F	1.21855e-11	-0.499117	0.719	0.94	3.56218e-07
AC010737.1	1.21968e-11	-2.57612	0.005	0.06	3.56549e-07
FUNDC1	1.29861e-11	-0.711126	0.125	0.333	3.79624e-07
TNKS1BP1	1.31395e-11	-0.606291	0.179	0.421	3.84107e-07
TOMM5	1.33234e-11	-0.600659	0.5	0.814	3.89482e-07
TREM2	1.348e-11	-5.25787	0	0.027	3.94059e-07
FYN	1.35579e-11	-0.590752	0.408	0.727	3.96338e-07
CREM	1.35878e-11	-0.634821	0.2	0.454	3.97212e-07
C9orf24	1.35927e-11	5.96958	0.221	0.011	3.97355e-07
MRPL47	1.36916e-11	-0.415514	0.24	0.53	4.00247e-07
EIF4G1	1.42347e-11	-0.475255	0.427	0.781	4.16123e-07
KCTD10	1.46435e-11	-0.654998	0.211	0.475	4.28073e-07
RAB3IL1	1.48532e-11	-1.39246	0.037	0.153	4.34203e-07
SNHG29	1.54957e-11	-0.424871	0.886	0.989	4.52986e-07
IMPDH2	1.576e-11	-0.556724	0.39	0.721	4.60713e-07
NOP10	1.57714e-11	-0.559393	0.558	0.852	4.61046e-07
ATP6V0D1	1.5872e-11	-0.490716	0.207	0.47	4.63987e-07
CDC42EP5	1.61331e-11	-0.597961	0.403	0.705	4.71619e-07
ITGAX	1.62226e-11	-5.48063	0.001	0.033	4.74235e-07
MTCH2	1.67386e-11	-0.579437	0.165	0.399	4.89319e-07
CORO2A	1.7056e-11	-1.13388	0.078	0.235	4.98599e-07
DBN1	1.79068e-11	-0.463901	0.214	0.481	5.23469e-07
RPL18	1.84252e-11	-0.307292	0.986	1	5.38623e-07
UQCC2	1.9501e-11	-0.244172	0.174	0.426	5.70073e-07
FAM131A	1.96873e-11	-0.847907	0.09	0.262	5.7552e-07
NUBP1	1.97106e-11	-0.78594	0.154	0.372	5.76201e-07
ZNF433-AS1	2.01812e-11	-0.858108	0.075	0.235	5.89957e-07
HMOX2	2.02161e-11	-0.586047	0.165	0.399	5.90977e-07
ZSWIM4	2.0238e-11	-1.36436	0.045	0.169	5.91617e-07
TOMM40	2.02876e-11	-0.479715	0.199	0.459	5.93066e-07
HCLS1	2.08869e-11	-0.911821	0.106	0.29	6.10586e-07
PTGR1	2.09687e-11	-0.58642	0.193	0.443	6.12978e-07
EMC8	2.10147e-11	-0.416739	0.142	0.361	6.14322e-07
AL353138.1	2.15963e-11	-1.08884	0.042	0.164	6.31323e-07
MON1B	2.16239e-11	-0.530246	0.24	0.519	6.32132e-07
TRPV2	2.20863e-11	-2.38828	0.013	0.087	6.45649e-07
CYB561D2	2.22848e-11	-0.872842	0.067	0.219	6.51452e-07
SURF4	2.2627e-11	-0.515845	0.324	0.645	6.61456e-07
FAM110D	2.33216e-11	-0.558745	0.428	0.732	6.81761e-07
MAFG	2.38991e-11	-0.470864	0.203	0.459	6.98643e-07
CCDC9B	2.43388e-11	-1.77666	0.013	0.087	7.11495e-07
TESC	2.51785e-11	-0.756248	0.242	0.497	7.36043e-07
AC027307.3	2.54038e-11	-1.71293	0.019	0.104	7.42628e-07
NUTF2	2.5456e-11	-0.546508	0.263	0.563	7.44155e-07
SLC50A1	2.5797e-11	-0.647264	0.144	0.361	7.54124e-07
RANGRF	2.63896e-11	-0.617483	0.129	0.339	7.71447e-07
PRCC	2.64273e-11	-0.591708	0.166	0.399	7.7255e-07
ELOC	2.66855e-11	-0.686229	0.461	0.76	7.80099e-07
ORAI2	2.66871e-11	-0.665533	0.179	0.415	7.80143e-07
AC004556.3	2.85615e-11	-1.33456	0.017	0.098	8.3494e-07
TICAM1	2.88571e-11	-1.18299	0.053	0.186	8.4358e-07
PPP2CA	2.89118e-11	-0.507386	0.277	0.568	8.45179e-07
THAP4	2.90254e-11	-0.569678	0.127	0.333	8.48499e-07
ELOVL5	2.95651e-11	-0.551428	0.238	0.519	8.64277e-07
DDT	3.01755e-11	-0.435163	0.448	0.814	8.82121e-07
BIN3	3.03779e-11	-0.730265	0.147	0.361	8.88036e-07
LIMCH1	3.04259e-11	1.6482	0.592	0.486	8.89439e-07
HK1	3.10118e-11	-0.509274	0.182	0.426	9.06568e-07
NDUFAF8	3.13065e-11	-0.565661	0.314	0.612	9.15182e-07
ARHGAP23	3.1852e-11	-0.651443	0.335	0.645	9.31129e-07
MAST4	3.19732e-11	-0.542054	0.425	0.76	9.34674e-07
CCDC69	3.24757e-11	-0.58025	0.428	0.732	9.49361e-07
MRPS12	3.38381e-11	-0.421682	0.27	0.574	9.89189e-07
ATAD3A	3.42896e-11	-0.603502	0.078	0.24	1.00239e-06
SIAE	3.49997e-11	-0.996695	0.075	0.23	1.02315e-06
MARCKSL1	3.50918e-11	-0.564405	0.68	0.869	1.02584e-06
TRPM4	3.63348e-11	-0.66061	0.104	0.284	1.06217e-06
CHRM3	3.7686e-11	3.94862	0.239	0.027	1.10167e-06
GSEC	3.79472e-11	-2.70299	0.007	0.066	1.10931e-06
ARHGEF2	3.90057e-11	-0.51602	0.292	0.596	1.14025e-06
IFI6	3.90275e-11	1.90191	0.598	0.508	1.14089e-06
BECN1	3.95819e-11	-0.443663	0.232	0.508	1.1571e-06
NDUFS8	3.98692e-11	-0.460315	0.369	0.71	1.1655e-06
KIAA0930	4.03215e-11	-0.691968	0.096	0.273	1.17872e-06
SLC35F2	4.09112e-11	-0.58553	0.151	0.372	1.19596e-06
LMNA	4.15503e-11	-0.462965	0.821	0.978	1.21464e-06
ADAMTS7	4.26284e-11	-1.16459	0.021	0.109	1.24616e-06
RTN2	4.27905e-11	-0.970152	0.053	0.186	1.25089e-06
TSPAN5	4.31602e-11	2.54136	0.364	0.153	1.2617e-06
DMAC2	4.34585e-11	-0.455515	0.182	0.426	1.27042e-06
ARPC3	4.35898e-11	-0.487602	0.727	0.945	1.27426e-06
CCT3	4.41918e-11	-0.518692	0.527	0.82	1.29186e-06
MPDU1	4.52925e-11	-0.738804	0.156	0.372	1.32404e-06
NAGA	4.73912e-11	-1.03227	0.065	0.208	1.38539e-06
SYT11	4.77588e-11	-0.509186	0.114	0.306	1.39613e-06
TRIM47	4.78962e-11	-0.586263	0.281	0.563	1.40015e-06
FXYD3	4.84412e-11	3.85104	0.267	0.055	1.41608e-06
PHACTR1	4.98144e-11	-0.877164	0.112	0.295	1.45622e-06
AGR2	5.03527e-11	3.4589	0.311	0.098	1.47196e-06
TCOF1	5.10977e-11	-0.277542	0.183	0.421	1.49374e-06
STIM2	5.15586e-11	-0.553015	0.445	0.781	1.50721e-06
KPTN	5.26663e-11	-1.46988	0.019	0.104	1.53959e-06
STX6	5.29433e-11	-0.745498	0.146	0.355	1.54769e-06
NDUFB3	5.34149e-11	-0.583263	0.421	0.77	1.56148e-06
MOV10L1	5.34269e-11	-2.05145	0.012	0.082	1.56183e-06
MRPL51	5.43549e-11	-0.491447	0.536	0.842	1.58896e-06
BAIAP2L1	5.43806e-11	-0.721193	0.081	0.24	1.58971e-06
GPRC5C	5.48291e-11	3.72912	0.248	0.038	1.60282e-06
CAVIN2	5.51855e-11	0.63362	0.897	0.929	1.61324e-06
YWHAG	5.6168e-11	-0.548509	0.333	0.634	1.64196e-06
C20orf85	5.71661e-11	6.80296	0.196	0	1.67114e-06
SLC26A6	5.72004e-11	-1.34229	0.019	0.104	1.67214e-06
SLC12A5	5.73661e-11	-2.946	0.006	0.06	1.67698e-06
TEX264	5.95428e-11	-0.516115	0.351	0.65	1.74061e-06
ECSCR	5.96927e-11	-0.406016	0.818	0.967	1.745e-06
UTY	6.16038e-11	-1.45564	0.023	0.115	1.80086e-06
GALNT7	6.2995e-11	-0.743473	0.105	0.284	1.84153e-06
RASGRP3	6.37168e-11	-0.414857	0.155	0.377	1.86263e-06
CRYBG1	6.38307e-11	-0.704909	0.168	0.388	1.86596e-06
SMIM10L1	6.39809e-11	-0.361605	0.241	0.53	1.87035e-06
RPS13	6.58894e-11	-0.287423	0.977	1	1.92614e-06
RANBP9	6.75667e-11	-0.688423	0.201	0.443	1.97518e-06
NPRL3	6.85519e-11	-0.555975	0.157	0.377	2.00398e-06
PHKG1	6.89106e-11	-0.70669	0.053	0.186	2.01446e-06
TRAPPC1	7.09956e-11	-0.527819	0.473	0.798	2.07542e-06
MSI2	7.36802e-11	-0.255905	0.194	0.454	2.15389e-06
SCHIP1	7.56182e-11	-1.43011	0.022	0.109	2.21055e-06
PSME3	7.59544e-11	-0.752556	0.139	0.344	2.22038e-06
ARL4A	7.73923e-11	0.710545	0.861	0.896	2.26241e-06
LY96	8.08399e-11	-0.577253	0.317	0.612	2.36319e-06
TMED3	8.15911e-11	-0.446428	0.193	0.443	2.38515e-06
AK2	8.22232e-11	-0.410234	0.342	0.683	2.40363e-06
SWAP70	8.33536e-11	-0.56664	0.591	0.852	2.43668e-06
KIF19	8.60974e-11	-0.890596	0.113	0.295	2.51689e-06
SLC27A4	8.79032e-11	-1.30189	0.042	0.158	2.56967e-06
GNL3	8.80175e-11	-0.582026	0.298	0.585	2.57302e-06
LRMP	8.82252e-11	-0.870901	0.032	0.137	2.57909e-06
NOTCH1	9.22333e-11	-0.47566	0.418	0.76	2.69626e-06
NOC4L	9.36267e-11	-0.722572	0.072	0.224	2.73699e-06
ATP11A	9.52073e-11	-0.58582	0.302	0.596	2.78319e-06
POLR1C	9.61687e-11	-0.559116	0.113	0.301	2.8113e-06
PDIA4	9.83118e-11	-0.490553	0.294	0.59	2.87395e-06
CARNMT1	1.00045e-10	-0.625416	0.103	0.284	2.92462e-06
PGAM1	1.02557e-10	-0.426545	0.325	0.645	2.99805e-06
UBE2J1	1.02636e-10	-0.630808	0.309	0.596	3.00036e-06
PHF10	1.03143e-10	-0.500517	0.223	0.486	3.01517e-06
MYO18A	1.03721e-10	-0.75683	0.171	0.388	3.03207e-06
CRY1	1.09566e-10	-0.927688	0.078	0.23	3.20295e-06
KXD1	1.09676e-10	-0.329931	0.301	0.612	3.20617e-06
CDK2	1.09832e-10	-0.5991	0.083	0.246	3.21071e-06
KLF16	1.1011e-10	-0.805428	0.074	0.224	3.21884e-06
N4BP2L2	1.13979e-10	0.735496	0.854	0.934	3.33195e-06
IBA57	1.17981e-10	-0.543871	0.11	0.295	3.44895e-06
DLL4	1.18444e-10	-0.88208	0.165	0.372	3.46247e-06
LAMC2	1.18995e-10	-0.7296	0.026	0.12	3.47858e-06
BAX	1.19068e-10	-0.674412	0.339	0.634	3.4807e-06
RPL5	1.19326e-10	-0.297012	0.984	1	3.48827e-06
ZNRD1	1.19878e-10	-0.450659	0.272	0.557	3.5044e-06
HSF4	1.20263e-10	-1.57446	0.018	0.098	3.51564e-06
GLRX3	1.23149e-10	-0.517672	0.261	0.536	3.6e-06
MED12	1.28686e-10	-0.500423	0.156	0.377	3.76189e-06
DDX21	1.29816e-10	-0.509507	0.498	0.792	3.79492e-06
HIST1H2AC	1.30447e-10	-0.661196	0.138	0.339	3.81334e-06
AL133245.1	1.33973e-10	-2.18075	0.022	0.109	3.91644e-06
AC090004.2	1.34677e-10	-0.684347	0.071	0.219	3.937e-06
MRPL24	1.34992e-10	-0.573066	0.169	0.393	3.94623e-06
RHOJ	1.45786e-10	-0.473102	0.423	0.732	4.26176e-06
CAPN15	1.47769e-10	-0.582778	0.096	0.268	4.31974e-06
FBLIM1	1.48783e-10	-1.19443	0.056	0.186	4.34938e-06
ALDH16A1	1.53041e-10	-0.269861	0.191	0.448	4.47384e-06
LEPROTL1	1.54534e-10	-0.578689	0.259	0.525	4.51748e-06
MIEN1	1.56567e-10	-0.471417	0.214	0.47	4.57692e-06
PLEKHA1	1.58773e-10	-0.408282	0.396	0.721	4.64142e-06
CCT7	1.61604e-10	-0.461699	0.458	0.781	4.72418e-06
CNDP2	1.6308e-10	-0.567794	0.323	0.617	4.7673e-06
RPL35	1.63722e-10	-0.295117	0.974	0.995	4.7861e-06
VPS13C	1.69591e-10	1.13368	0.679	0.661	4.95766e-06
MAP1S	1.70289e-10	-0.781547	0.107	0.284	4.97805e-06
ACTN1	1.71082e-10	-0.507667	0.638	0.858	5.00125e-06
E2F3	1.77671e-10	-0.907362	0.081	0.235	5.19387e-06
VDAC1	1.78174e-10	-0.514144	0.406	0.738	5.20855e-06
CCDC126	1.78622e-10	-0.479686	0.09	0.257	5.22165e-06
MAP2K2	1.79757e-10	-0.480283	0.469	0.781	5.25484e-06
FURIN	1.82968e-10	-0.562187	0.19	0.421	5.34871e-06
SGSM3	1.83863e-10	-0.200155	0.19	0.437	5.37487e-06
TPP1	1.84402e-10	-0.336177	0.278	0.579	5.39063e-06
TRIM28	1.8552e-10	-0.471994	0.342	0.656	5.42329e-06
TOR3A	1.89814e-10	-0.637403	0.16	0.377	5.54883e-06
AC125807.2	1.90911e-10	-1.64138	0.029	0.126	5.5809e-06
TPK1	1.91706e-10	-1.08126	0.083	0.235	5.60414e-06
COQ8A	1.91962e-10	-0.576168	0.219	0.47	5.61161e-06
FARSB	2.02706e-10	-0.701055	0.11	0.29	5.92571e-06
SUSD6	2.02781e-10	-0.56996	0.244	0.497	5.92789e-06
ITGAE	2.04182e-10	-0.471394	0.206	0.454	5.96886e-06
ATOX1	2.09573e-10	-0.53063	0.557	0.847	6.12644e-06
PTP4A2	2.10092e-10	-0.550399	0.485	0.814	6.14161e-06
ALDH1A1	2.19402e-10	3.08677	0.301	0.093	6.41376e-06
POLDIP2	2.21433e-10	-0.50749	0.196	0.437	6.47316e-06
BOLA3	2.23659e-10	-0.432226	0.22	0.481	6.53822e-06
COA1	2.24837e-10	-0.347616	0.26	0.546	6.57266e-06
SPATS2	2.33332e-10	-0.494389	0.232	0.492	6.821e-06
SNCA	2.38578e-10	-0.843467	0.174	0.388	6.97436e-06
THOC6	2.39598e-10	-1.17959	0.064	0.202	7.00417e-06
PLCD3	2.39598e-10	-0.893876	0.064	0.202	7.00417e-06
FASTKD1	2.40493e-10	-0.822917	0.069	0.213	7.03035e-06
LRRC59	2.40514e-10	-0.570244	0.158	0.372	7.03094e-06
FAM124A	2.46636e-10	-0.770672	0.088	0.246	7.2099e-06
CCL15	2.47049e-10	-1.07535	0.02	0.104	7.22198e-06
ADAM19	2.4712e-10	-1.33527	0.027	0.12	7.22405e-06
LYPLA2	2.49876e-10	-0.279476	0.202	0.454	7.30463e-06
CAD	2.51839e-10	-0.886417	0.067	0.208	7.36201e-06
ASXL2	2.55865e-10	-0.416764	0.248	0.525	7.47972e-06
BCL7B	2.56707e-10	-0.512867	0.196	0.437	7.50431e-06
OSTF1	2.61408e-10	-0.523558	0.346	0.656	7.64175e-06
TXNL4A	2.65106e-10	-0.586711	0.302	0.585	7.74983e-06
ATP13A2	2.65569e-10	-0.680668	0.123	0.311	7.76339e-06
RUNDC3B	2.67466e-10	-0.62638	0.284	0.552	7.81885e-06
DAP	2.69954e-10	-0.46904	0.311	0.601	7.89157e-06
MTLN	2.70211e-10	-0.552757	0.387	0.705	7.89908e-06
AC011939.2	2.71674e-10	-1.18084	0.041	0.153	7.94184e-06
AL136169.1	2.77145e-10	-1.01125	0.034	0.137	8.10179e-06
AC092868.2	2.87242e-10	-1.63846	0.032	0.131	8.39694e-06
NOTCH4	2.91981e-10	-0.592663	0.413	0.721	8.53549e-06
ZNRF1	2.92608e-10	-0.415154	0.278	0.563	8.55382e-06
ZGPAT	3.04795e-10	-0.56332	0.146	0.35	8.91008e-06
TMEM11	3.1522e-10	-0.41904	0.202	0.448	9.21483e-06
ECRG4	3.1711e-10	3.99867	0.223	0.027	9.27008e-06
PODN	3.2037e-10	-1.30205	0.019	0.098	9.36538e-06
DIS3L	3.24848e-10	-0.525279	0.127	0.322	9.49629e-06
FHOD1	3.3042e-10	-0.618648	0.098	0.268	9.65916e-06
CHMP1A	3.31407e-10	-0.385502	0.192	0.437	9.68802e-06
FCHO1	3.32816e-10	-2.25357	0.013	0.082	9.72922e-06
CHSY1	3.33317e-10	-0.418465	0.418	0.749	9.74386e-06
DYRK1B	3.3659e-10	-0.344907	0.1	0.273	9.83955e-06
NAMPT	3.50405e-10	-0.490184	0.497	0.787	1.02434e-05
AHCY	3.6154e-10	-0.573049	0.133	0.328	1.05689e-05
TOR1A	3.69461e-10	-0.673673	0.148	0.35	1.08004e-05
MYL12A	3.78911e-10	0.440973	0.935	0.978	1.10767e-05
FAM174C	3.91119e-10	-0.371774	0.315	0.628	1.14336e-05
FHL3	3.97779e-10	-0.893515	0.083	0.235	1.16283e-05
LINC01615	4.01358e-10	-2.88572	0.003	0.044	1.17329e-05
MOB3A	4.1295e-10	-0.495073	0.098	0.268	1.20718e-05
FAM207A	4.13342e-10	-0.662255	0.121	0.306	1.20832e-05
ZFAND3	4.14772e-10	-0.614023	0.192	0.421	1.2125e-05
PPM1G	4.30371e-10	-0.429782	0.46	0.798	1.2581e-05
MRPL14	4.31196e-10	-0.378965	0.282	0.579	1.26052e-05
ZDHHC24	4.3513e-10	-0.490632	0.247	0.503	1.27201e-05
MTHFD2L	4.40386e-10	-0.636919	0.117	0.301	1.28738e-05
RTCA	4.42179e-10	-0.428683	0.174	0.399	1.29262e-05
CCNY	4.56273e-10	-0.502144	0.395	0.743	1.33382e-05
NLRP12	4.56645e-10	-2.86655	0.004	0.049	1.33491e-05
ILF2	4.58534e-10	-0.518634	0.446	0.77	1.34043e-05
CADM3-AS1	4.61686e-10	-0.530247	0.124	0.311	1.34965e-05
SH3RF3	4.65699e-10	-0.915509	0.07	0.213	1.36138e-05
AF131215.4	4.75551e-10	-2.66294	0.004	0.049	1.39018e-05
NHP2	4.86291e-10	-0.508732	0.426	0.727	1.42157e-05
FAAP20	4.88903e-10	-0.413618	0.287	0.585	1.42921e-05
FUCA2	4.95624e-10	-0.537095	0.16	0.372	1.44886e-05
ALG6	4.98933e-10	-0.567266	0.09	0.251	1.45853e-05
SMIM10	5.00214e-10	-0.542857	0.254	0.519	1.46228e-05
MT-ND1	5.01647e-10	0.264202	1	1	1.46647e-05
RFK	5.02557e-10	-0.445476	0.276	0.563	1.46913e-05
MTERF3	5.02604e-10	-0.777494	0.069	0.208	1.46926e-05
BID	5.04109e-10	-0.656518	0.188	0.41	1.47366e-05
LOXL2	5.10475e-10	-0.589332	0.137	0.333	1.49227e-05
RGS14	5.11151e-10	-0.951551	0.063	0.197	1.49425e-05
INTS11	5.15435e-10	-0.494752	0.239	0.497	1.50677e-05
UBE2G1	5.23178e-10	-0.3649	0.178	0.404	1.52941e-05
LSM12	5.31691e-10	-0.371563	0.227	0.486	1.55429e-05
NOL9	5.38842e-10	-0.431308	0.199	0.437	1.5752e-05
CHCHD1	5.43204e-10	-0.359626	0.305	0.607	1.58795e-05
S100A16	5.44685e-10	-0.460905	0.693	0.945	1.59228e-05
TXNDC5	5.46071e-10	-0.421694	0.262	0.541	1.59633e-05
SH2D3C	5.71256e-10	-0.31806	0.348	0.656	1.66995e-05
TXNDC17	5.72496e-10	-0.495711	0.388	0.71	1.67358e-05
RUNX1T1	5.7338e-10	1.1984	0.609	0.497	1.67616e-05
HLA-DOA	5.76947e-10	-0.671086	0.217	0.454	1.68659e-05
MCRIP1	5.78957e-10	-0.48669	0.382	0.699	1.69247e-05
PSPC1	5.8155e-10	-0.398778	0.17	0.393	1.70004e-05
SLC8A1	5.81573e-10	-1.48672	0.051	0.169	1.70011e-05
CORO1B	5.92151e-10	-0.466397	0.354	0.656	1.73104e-05
CISD3	5.9629e-10	-0.434735	0.19	0.426	1.74313e-05
SCAMP5	5.97141e-10	-1.4206	0.048	0.164	1.74562e-05
HSPE1	6.00958e-10	-0.423782	0.609	0.902	1.75678e-05
DTYMK	6.05985e-10	-0.682955	0.167	0.383	1.77148e-05
PPP1R15B	6.29429e-10	-0.54518	0.265	0.525	1.84001e-05
RPL14	6.39622e-10	-0.324451	0.967	1	1.86981e-05
BYSL	6.48766e-10	-0.758938	0.039	0.148	1.89654e-05
TTL	6.54939e-10	-0.595434	0.147	0.35	1.91458e-05
DDX49	6.69129e-10	-0.542306	0.129	0.317	1.95606e-05
TIMM10	6.82638e-10	-0.518886	0.323	0.607	1.99556e-05
ARHGEF1	6.83658e-10	-0.503891	0.233	0.486	1.99854e-05
RNASEH2C	6.95824e-10	-0.432439	0.4	0.716	2.0341e-05
TXLNA	6.96031e-10	-0.422205	0.225	0.481	2.03471e-05
MT2A	7.11145e-10	1.65316	0.665	0.601	2.07889e-05
CHCHD3	7.16579e-10	-0.491954	0.192	0.421	2.09477e-05
DENND2D	7.25096e-10	-1.19705	0.056	0.18	2.11967e-05
LHFPL2	7.25607e-10	-0.33095	0.168	0.388	2.12117e-05
ATF4	7.27259e-10	-0.488749	0.644	0.885	2.126e-05
NEIL1	7.30488e-10	-0.453019	0.275	0.552	2.13544e-05
TBC1D30	7.40401e-10	-0.954723	0.058	0.186	2.16441e-05
STARD7	7.42633e-10	-0.2648	0.36	0.705	2.17094e-05
GOT2	7.47775e-10	-0.7355	0.153	0.355	2.18597e-05
TECPR1	7.54394e-10	-0.57218	0.26	0.519	2.20532e-05
EVA1C	7.64838e-10	-0.475123	0.352	0.65	2.23585e-05
RNF115	7.66769e-10	1.01058	0.694	0.732	2.24149e-05
JARID2	7.69357e-10	-0.29503	0.194	0.432	2.24906e-05
TACC1	7.73501e-10	0.606671	0.905	0.94	2.26117e-05
SIGIRR	7.78946e-10	-0.397871	0.391	0.738	2.27709e-05
RABL6	7.8143e-10	-0.412832	0.276	0.557	2.28435e-05
SCYL1	7.82407e-10	-0.40417	0.15	0.355	2.28721e-05
NAPRT	7.83673e-10	-0.467573	0.268	0.546	2.29091e-05
YARS	7.89181e-10	-0.788627	0.115	0.29	2.30701e-05
GFOD2	8.01278e-10	-0.548426	0.318	0.607	2.34237e-05
ABCE1	8.02982e-10	-0.464687	0.327	0.607	2.34736e-05
SMARCA4	8.06659e-10	-0.389733	0.311	0.601	2.35811e-05
TSPO	8.11978e-10	-0.444372	0.764	0.94	2.37365e-05
EID2	8.14524e-10	-0.36529	0.128	0.322	2.3811e-05
YBX1	8.14998e-10	-0.374943	0.899	0.995	2.38248e-05
SYK	8.55098e-10	-3.10472	0.007	0.06	2.49971e-05
PABPC4	8.63284e-10	-0.35344	0.316	0.617	2.52364e-05
MAP3K8	8.71451e-10	-0.488835	0.289	0.552	2.54751e-05
IRGQ	8.76052e-10	-0.866388	0.069	0.208	2.56096e-05
CANT1	8.87156e-10	-0.498918	0.151	0.355	2.59342e-05
COX17	8.88062e-10	-0.453261	0.429	0.738	2.59607e-05
NXT1	9.02582e-10	-0.55102	0.212	0.454	2.63852e-05
THOC3	9.16197e-10	-0.447502	0.137	0.333	2.67832e-05
TWF1	9.31564e-10	-0.397441	0.206	0.448	2.72324e-05
AC020916.1	9.35475e-10	-0.703819	0.409	0.672	2.73467e-05
CXCL17	9.51379e-10	4.53024	0.212	0.027	2.78117e-05
TMEM256	9.57044e-10	-0.433057	0.391	0.71	2.79773e-05
AUP1	9.79902e-10	-0.311912	0.318	0.607	2.86455e-05
ELP6	9.91448e-10	-0.46797	0.154	0.361	2.8983e-05
TMED1	9.92719e-10	-0.498735	0.16	0.372	2.90201e-05
RPS5	1.01177e-09	-0.344347	0.968	1	2.95771e-05
MRPS27	1.01624e-09	-0.521784	0.196	0.426	2.97078e-05
SIAH2	1.039e-09	-0.602158	0.111	0.284	3.03731e-05
BLOC1S4	1.03915e-09	-0.455574	0.19	0.415	3.03776e-05
VHL	1.04718e-09	-0.559677	0.138	0.333	3.06122e-05
PLSCR1	1.04829e-09	-0.484875	0.582	0.891	3.06448e-05
ITPA	1.06224e-09	-0.465695	0.166	0.377	3.10526e-05
RSPH1	1.06386e-09	5.07124	0.183	0.005	3.10997e-05
MRPL32	1.07515e-09	-0.417757	0.348	0.65	3.14298e-05
FOXRED1	1.10279e-09	-0.63261	0.101	0.268	3.22378e-05
TIGAR	1.12663e-09	-0.885761	0.065	0.197	3.29347e-05
POGLUT1	1.1511e-09	-0.541637	0.185	0.415	3.36501e-05
PDLIM7	1.15762e-09	-0.411776	0.221	0.475	3.38406e-05
FRAT2	1.16324e-09	-0.516451	0.089	0.246	3.4005e-05
SSPN	1.16912e-09	4.77998	0.189	0.011	3.41768e-05
GPSM3	1.17525e-09	-0.783273	0.094	0.251	3.43561e-05
NSMF	1.1851e-09	-0.695401	0.086	0.24	3.4644e-05
KEAP1	1.20171e-09	-0.426919	0.178	0.404	3.51297e-05
ALKBH5	1.23333e-09	-0.382998	0.283	0.574	3.6054e-05
IL6	1.26552e-09	-0.577193	0.06	0.186	3.6995e-05
POLD2	1.2657e-09	-0.25391	0.197	0.437	3.70003e-05
HPRT1	1.26643e-09	-0.401758	0.175	0.399	3.70214e-05
URGCP	1.27242e-09	-0.514558	0.155	0.361	3.71965e-05
SERINC5	1.27335e-09	-0.650407	0.189	0.399	3.72239e-05
TNFRSF10A	1.28599e-09	-0.240129	0.214	0.47	3.75934e-05
HSP90B1	1.29712e-09	-0.507263	0.789	0.973	3.79189e-05
CRHBP	1.30824e-09	1.25647	0.468	0.24	3.82437e-05
AL022311.1	1.34335e-09	-0.585586	0.059	0.186	3.92703e-05
CLNS1A	1.36234e-09	-0.40406	0.325	0.639	3.98254e-05
PDE2A	1.36432e-09	1.36702	0.534	0.388	3.98831e-05
CCDC80	1.36433e-09	2.54045	0.361	0.175	3.98834e-05
EXT1	1.3872e-09	-0.280314	0.118	0.301	4.0552e-05
FBXW5	1.40316e-09	-0.470187	0.355	0.645	4.10185e-05
PHLDA1	1.4109e-09	-0.458004	0.253	0.508	4.12447e-05
IL4R	1.41927e-09	-0.324142	0.253	0.519	4.14895e-05
PDIA5	1.42614e-09	-0.56764	0.307	0.574	4.16902e-05
DHX30	1.43284e-09	-0.325171	0.242	0.508	4.18863e-05
KIAA0100	1.43453e-09	-0.47608	0.261	0.519	4.19357e-05
FAM162A	1.43887e-09	-0.402155	0.336	0.645	4.20626e-05
PBX2	1.44751e-09	-0.405204	0.221	0.47	4.2315e-05
UBXN10-AS1	1.47068e-09	-4.88947	0	0.022	4.29924e-05
CD209	1.47068e-09	-5.94268	0	0.022	4.29924e-05
AP000569.1	1.47068e-09	-4.89623	0	0.022	4.29924e-05
CLC	1.47068e-09	-5.07714	0	0.022	4.29924e-05
GDF5	1.50171e-09	-4.50255	0.001	0.027	4.38994e-05
GIMAP1	1.50254e-09	0.709549	0.808	0.874	4.39237e-05
DOK3	1.5274e-09	-1.18565	0.018	0.093	4.46505e-05
AF131215.2	1.55778e-09	-4.48771	0.001	0.027	4.55386e-05
INSYN1	1.55778e-09	-4.15861	0.001	0.027	4.55386e-05
SERPINB13	1.55778e-09	-4.2722	0.001	0.027	4.55386e-05
RHOG	1.58649e-09	-0.450771	0.232	0.481	4.6378e-05
WDR61	1.63317e-09	-0.321254	0.261	0.541	4.77423e-05
HNRNPL	1.64323e-09	-0.46201	0.314	0.596	4.80365e-05
AC108463.3	1.67268e-09	-1.87413	0.009	0.066	4.88975e-05
RAB5IF	1.68237e-09	-0.498035	0.357	0.661	4.91806e-05
HDAC9	1.69792e-09	-0.829762	0.194	0.404	4.96354e-05
ATP11C	1.71718e-09	-0.600989	0.319	0.59	5.01983e-05
SMARCC1	1.7439e-09	-0.395203	0.268	0.53	5.09794e-05
NDUFAF2	1.78514e-09	-0.595804	0.173	0.383	5.21849e-05
SINHCAF	1.88443e-09	-0.354878	0.238	0.492	5.50876e-05
JPT1	1.88551e-09	-0.633285	0.194	0.415	5.51191e-05
AARS	1.88834e-09	-0.569075	0.156	0.361	5.52018e-05
RPL22	1.90341e-09	-0.269079	0.973	1	5.56424e-05
VDR	1.90459e-09	-1.59748	0.009	0.066	5.56768e-05
SH3BGRL2	1.90769e-09	1.6646	0.53	0.443	5.57676e-05
SERTAD4-AS1	1.92343e-09	-0.495141	0.296	0.568	5.62277e-05
MARC2	1.92625e-09	-0.423082	0.144	0.339	5.63102e-05
NLE1	1.93659e-09	-0.741232	0.068	0.202	5.66123e-05
KRI1	1.94288e-09	-0.380262	0.124	0.306	5.67961e-05
ATP2A2	1.97564e-09	-0.363818	0.333	0.628	5.77539e-05
MRPS24	1.97626e-09	-0.415382	0.458	0.776	5.77721e-05
UBE2D3	1.98493e-09	-0.365037	0.722	0.94	5.80253e-05
TIMM17A	1.99001e-09	-0.342938	0.187	0.415	5.81741e-05
MOB3B	2.01441e-09	-0.428024	0.102	0.268	5.88873e-05
HIKESHI	2.09385e-09	-0.481653	0.288	0.563	6.12097e-05
TMEM92	2.10193e-09	-2.08304	0.013	0.077	6.14457e-05
RASAL3	2.10707e-09	-0.994398	0.051	0.169	6.15959e-05
ABHD17A	2.14061e-09	-0.489624	0.487	0.781	6.25765e-05
CDC34	2.19229e-09	-0.472355	0.199	0.426	6.40871e-05
SYNPO	2.20742e-09	-0.644804	0.393	0.678	6.45295e-05
PCNX2	2.23438e-09	-0.681666	0.044	0.153	6.53177e-05
LINC00895	2.24657e-09	-2.61812	0.002	0.038	6.5674e-05
CHCHD10	2.24797e-09	-0.194329	0.227	0.486	6.57148e-05
CLIC2	2.25733e-09	-0.428611	0.328	0.628	6.59884e-05
TUSC1	2.30509e-09	-0.648608	0.177	0.388	6.73848e-05
FAM189B	2.30824e-09	-0.472671	0.133	0.322	6.74768e-05
UQCRB	2.33085e-09	-0.339669	0.868	0.984	6.81378e-05
DCHS1	2.34896e-09	-0.408075	0.281	0.557	6.8667e-05
NOP56	2.35029e-09	-0.398232	0.396	0.71	6.87061e-05
ARMC6	2.40323e-09	-0.951993	0.066	0.197	7.02535e-05
HDLBP	2.47245e-09	-0.479119	0.486	0.836	7.22771e-05
ALDOA	2.51233e-09	-0.604676	0.082	0.23	7.34429e-05
CYTH1	2.52005e-09	-0.421067	0.369	0.672	7.36686e-05
CNRIP1	2.53015e-09	-0.516031	0.244	0.492	7.39638e-05
MRPS15	2.56564e-09	-0.423353	0.306	0.59	7.50014e-05
ODC1	2.60771e-09	-0.489842	0.223	0.459	7.62312e-05
CIAO2A	2.65339e-09	-0.603968	0.141	0.328	7.75664e-05
KCNT2	2.69424e-09	-0.546436	0.068	0.202	7.87606e-05
SPHK1	2.72324e-09	-0.68811	0.293	0.536	7.96085e-05
RPS15A	2.75343e-09	-0.261702	0.987	1	8.0491e-05
MID1	2.75773e-09	-0.657205	0.166	0.366	8.06167e-05
LINC02732	2.76938e-09	-3.11342	0.004	0.044	8.09572e-05
CD163L1	2.88652e-09	-2.97786	0.004	0.044	8.43815e-05
CDC42EP3	2.90178e-09	-0.459596	0.46	0.76	8.48279e-05
FAM104B	2.90465e-09	-0.431609	0.109	0.279	8.49115e-05
CD34	2.91586e-09	-0.408778	0.756	0.934	8.52392e-05
STX2	2.91705e-09	-0.328228	0.201	0.432	8.52742e-05
ARHGAP22	2.94281e-09	-2.66602	0.008	0.06	8.60273e-05
NDUFS2	2.97047e-09	-0.282604	0.357	0.683	8.68358e-05
EIF3H	3.01011e-09	-0.447293	0.641	0.907	8.79946e-05
TMEM19	3.01258e-09	-0.60943	0.121	0.295	8.80668e-05
AEN	3.06903e-09	-0.614926	0.062	0.191	8.97169e-05
IFNAR2	3.07534e-09	-0.412571	0.279	0.552	8.99015e-05
NMT1	3.09669e-09	-0.448372	0.336	0.628	9.05255e-05
HSF1	3.12308e-09	-0.447598	0.285	0.557	9.12969e-05
ZNF3	3.14985e-09	-0.309846	0.182	0.404	9.20796e-05
CRYBG3	3.17118e-09	-0.515133	0.427	0.732	9.2703e-05
NUDT14	3.28942e-09	-0.361183	0.351	0.645	9.61596e-05
TMEM150A	3.31015e-09	-0.345289	0.142	0.339	9.67658e-05
PCGF2	3.42051e-09	-0.529135	0.354	0.639	9.99917e-05
UNC45A	3.44678e-09	-0.463936	0.165	0.377	0.00010076
HYOU1	3.4846e-09	-0.647124	0.148	0.339	0.000101865
PTPN12	3.51021e-09	-0.454059	0.491	0.809	0.000102614
CCNYL1	3.52319e-09	-0.561412	0.152	0.35	0.000102994
RPL36A	3.56204e-09	-0.307066	0.966	1	0.000104129
MAP7D1	3.63465e-09	-0.537836	0.209	0.437	0.000106252
APOO	3.64664e-09	-0.521357	0.072	0.208	0.000106602
SYCE1L	3.65442e-09	-0.794449	0.079	0.219	0.00010683
TFB2M	3.66111e-09	-0.587483	0.074	0.213	0.000107025
SMIM30	3.67928e-09	-0.527077	0.218	0.448	0.000107556
AL390728.6	3.71983e-09	-0.448362	0.206	0.437	0.000108742
GTF2E2	3.78581e-09	-0.408796	0.137	0.328	0.000110671
NRROS	3.80835e-09	-0.958842	0.056	0.175	0.000111329
NPC2	3.85477e-09	-0.617859	0.758	0.951	0.000112687
HES1	3.85897e-09	1.61454	0.53	0.388	0.000112809
TBKBP1	3.9084e-09	-0.608145	0.118	0.29	0.000114254
SAE1	4.00416e-09	-0.517532	0.182	0.399	0.000117054
INAFM2	4.00662e-09	-1.46689	0.021	0.098	0.000117125
TSPAN17	4.05243e-09	-0.490266	0.08	0.224	0.000118465
PRKRA	4.10277e-09	-0.47564	0.197	0.421	0.000119936
AC100803.4	4.13228e-09	-1.9809	0.01	0.066	0.000120799
QPCT	4.14031e-09	-0.575111	0.062	0.191	0.000121034
MEX3A	4.19221e-09	-0.94897	0.039	0.142	0.000122551
MLST8	4.24451e-09	-0.444596	0.103	0.268	0.00012408
MPG	4.40336e-09	-0.632356	0.347	0.612	0.000128723
CYB561A3	4.41751e-09	-0.466811	0.128	0.306	0.000129137
PDE4A	4.44313e-09	-0.729939	0.075	0.213	0.000129886
SF3B3	4.44428e-09	-0.387384	0.3	0.574	0.00012992
AC010198.2	4.45665e-09	-1.45486	0.031	0.12	0.000130281
TYMS	4.48795e-09	-1.69538	0.019	0.093	0.000131196
TOX2	4.50921e-09	-0.690368	0.067	0.197	0.000131818
PPP1R16A	4.56178e-09	-0.225034	0.137	0.328	0.000133354
LDHA	4.58479e-09	-0.411102	0.747	0.951	0.000134027
NAP1L1	4.64792e-09	-0.392321	0.767	0.984	0.000135873
ADGRA2	4.66464e-09	2.21726	0.335	0.148	0.000136362
PLIN3	4.6796e-09	-0.388405	0.172	0.388	0.000136799
MALAT1	4.6943e-09	0.303668	1	1	0.000137229
SMARCD1	4.71792e-09	-0.373367	0.221	0.459	0.000137919
ARHGAP4	4.74417e-09	-1.04145	0.054	0.169	0.000138686
AC105046.1	4.77999e-09	-1.84387	0.019	0.093	0.000139733
ITGA8	4.85399e-09	-1.39457	0.028	0.115	0.000141897
SOCS1	4.91122e-09	-1.09018	0.085	0.23	0.00014357
TOP1MT	4.92571e-09	-1.26563	0.062	0.186	0.000143993
FBL	4.94377e-09	-0.490947	0.503	0.82	0.000144521
ALAS1	4.96164e-09	-0.739499	0.101	0.257	0.000145044
NOP2	4.96229e-09	-1.04096	0.054	0.169	0.000145063
DPP9	4.99657e-09	-0.39358	0.172	0.377	0.000146065
SFMBT2	5.07734e-09	-0.528824	0.144	0.333	0.000148426
TNFRSF18	5.23935e-09	-1.75128	0.011	0.071	0.000153162
TCEAL1	5.2437e-09	-0.593537	0.194	0.41	0.000153289
HNRNPU	5.25728e-09	-0.422513	0.826	0.962	0.000153686
FNDC3B	5.25837e-09	-0.399792	0.312	0.596	0.000153718
SIL1	5.29247e-09	-0.372397	0.158	0.355	0.000154715
TAF12	5.29385e-09	-0.32522	0.22	0.464	0.000154755
TANK	5.29433e-09	-0.51288	0.215	0.443	0.000154769
JAK3	5.30536e-09	-0.988883	0.068	0.197	0.000155092
TMA16	5.32195e-09	-0.309763	0.2	0.432	0.000155576
TIAM1	5.32573e-09	-1.6592	0.013	0.077	0.000155687
MRPL58	5.35463e-09	-0.54092	0.121	0.295	0.000156532
OAF	5.37237e-09	-0.734298	0.159	0.35	0.00015705
MRPL9	5.52298e-09	-0.461948	0.284	0.546	0.000161453
METRNL	5.56728e-09	1.51378	0.475	0.306	0.000162748
RUNDC1	5.61532e-09	-0.64738	0.102	0.257	0.000164153
SARS	5.64428e-09	-0.345828	0.418	0.749	0.000164999
RCOR1	5.80638e-09	-0.546912	0.126	0.301	0.000169738
YIF1B	5.89603e-09	-0.537944	0.145	0.333	0.000172359
IL2RG	5.92232e-09	-1.24631	0.038	0.137	0.000173127
C1R	6.08e-09	-0.621383	0.204	0.426	0.000177737
CES1	6.09324e-09	4.4959	0.199	0.027	0.000178124
HMBS	6.13878e-09	-0.758335	0.03	0.12	0.000179455
LIMK2	6.18871e-09	-0.203123	0.172	0.388	0.000180915
HMGA1	6.19247e-09	-0.760836	0.089	0.235	0.000181024
DNAJC2	6.20336e-09	-0.351589	0.253	0.508	0.000181343
TSEN15	6.2746e-09	-0.623642	0.118	0.29	0.000183425
CINP	6.27932e-09	-0.2561	0.221	0.47	0.000183563
EIF3J	6.33253e-09	-0.457292	0.414	0.71	0.000185119
SPNS2	6.34326e-09	-0.539431	0.376	0.645	0.000185433
FAM136A	6.35126e-09	-0.361741	0.171	0.383	0.000185666
GGA1	6.38265e-09	-0.39405	0.218	0.454	0.000186584
C12orf10	6.39441e-09	-0.380044	0.324	0.623	0.000186928
CSNK1D	6.4664e-09	-0.365147	0.324	0.607	0.000189032
DRG1	6.48006e-09	-0.462295	0.15	0.344	0.000189432
MAGI3	6.50024e-09	-0.393409	0.164	0.361	0.000190022
PTRH1	6.50745e-09	-0.240725	0.156	0.355	0.000190232
FKBP4	6.5379e-09	-0.172913	0.194	0.421	0.000191122
KLF4	6.55698e-09	1.00223	0.731	0.743	0.00019168
CIAPIN1	6.58838e-09	-0.625974	0.148	0.339	0.000192598
INTS13	6.60913e-09	-0.840293	0.083	0.224	0.000193205
LSM10	6.63127e-09	-0.552479	0.186	0.399	0.000193852
AL627171.2	6.71224e-09	-0.512493	0.151	0.344	0.000196219
ASB9	6.74791e-09	-0.572575	0.12	0.29	0.000197262
TFF3	6.93475e-09	2.95592	0.404	0.251	0.000202724
KCNN3	7.11657e-09	1.31489	0.433	0.24	0.000208039
NFATC1	7.11702e-09	-0.683982	0.113	0.279	0.000208052
TIMM8B	7.13293e-09	-0.428477	0.384	0.694	0.000208517
ASMTL	7.19674e-09	-0.463187	0.164	0.366	0.000210382
GPRC5B	7.30187e-09	-0.408105	0.275	0.514	0.000213456
GGCT	7.3816e-09	-0.359145	0.345	0.645	0.000215786
SLFN5	7.4449e-09	-0.303879	0.582	0.869	0.000217637
CEBPG	7.52298e-09	-0.23318	0.248	0.508	0.000219919
ITGA3	7.60222e-09	-0.62239	0.22	0.443	0.000222236
IL18BP	7.61359e-09	-0.643359	0.163	0.361	0.000222568
PLSCR3	7.67793e-09	-0.437824	0.197	0.421	0.000224449
DNAJB9	7.7098e-09	-0.419201	0.203	0.426	0.00022538
FIGNL2	7.74896e-09	-2.25146	0.016	0.082	0.000226525
LOX	7.80849e-09	-1.1013	0.057	0.175	0.000228266
FAM120A	7.92465e-09	-0.459649	0.436	0.727	0.000231661
LSR	7.96097e-09	-0.678419	0.276	0.514	0.000232723
ARHGDIA	7.97359e-09	-0.466622	0.486	0.798	0.000233092
SON	8.05127e-09	0.537848	0.916	0.956	0.000235363
VPS35L	8.19781e-09	-0.47197	0.154	0.35	0.000239647
SEC61A1	8.37588e-09	-0.384099	0.318	0.59	0.000244852
CYBA	8.40992e-09	-0.372081	0.361	0.645	0.000245847
BNC2	8.85096e-09	-0.556349	0.165	0.361	0.00025874
PES1	8.91377e-09	-0.407445	0.172	0.383	0.000260576
AIFM1	9.01481e-09	-0.580966	0.112	0.273	0.00026353
NUP88	9.0954e-09	-0.851376	0.084	0.224	0.000265886
SMCR5	9.10794e-09	-1.19735	0.024	0.104	0.000266252
ACTR3	9.19702e-09	-0.426198	0.484	0.787	0.000268856
PSMC4	9.21349e-09	-0.273977	0.309	0.596	0.000269338
LAMTOR2	9.23614e-09	-0.416021	0.375	0.683	0.00027
IPO7	9.24961e-09	-0.479073	0.341	0.634	0.000270394
USF2	9.2586e-09	-0.527439	0.373	0.656	0.000270657
ACER3	9.35402e-09	-0.441879	0.162	0.361	0.000273446
EIF4E2	9.42074e-09	-0.261999	0.244	0.508	0.000275397
ANXA1	9.58826e-09	0.68981	0.852	0.885	0.000280294
CSNK1G1	9.82847e-09	-0.336661	0.172	0.377	0.000287316
WDR1	1.00078e-08	-0.326096	0.409	0.721	0.000292559
EIF2AK4	1.00342e-08	-0.373769	0.348	0.65	0.00029333
CLPTM1L	1.00859e-08	-0.22359	0.276	0.552	0.000294841
SERTAD3	1.01397e-08	-0.630614	0.221	0.432	0.000296415
SCAMP4	1.01913e-08	-0.427988	0.157	0.35	0.000297923
C14orf119	1.0201e-08	-0.342247	0.315	0.601	0.000298205
AL731571.1	1.0235e-08	-3.92187	0.002	0.033	0.000299199
F13A1	1.02392e-08	-3.17968	0.005	0.049	0.000299323
ACBD3	1.02601e-08	-0.341083	0.411	0.749	0.000299934
ACE	1.03157e-08	-0.616256	0.245	0.475	0.00030156
CCM2	1.03321e-08	-0.615483	0.204	0.421	0.000302038
EPHA1-AS1	1.03601e-08	-1.30821	0.016	0.082	0.000302858
SDF4	1.04128e-08	-0.341998	0.382	0.694	0.000304398
PROSER2	1.05583e-08	-0.972372	0.036	0.131	0.00030865
MMP14	1.05714e-08	-0.620399	0.123	0.29	0.000309032
PHYHIP	1.05867e-08	-1.88479	0.008	0.06	0.000309482
ITGB1BP1	1.06223e-08	-0.415703	0.396	0.689	0.000310521
ERF	1.06846e-08	-0.396889	0.255	0.508	0.000312344
DGKI	1.07687e-08	-2.12849	0.005	0.049	0.000314803
AC132872.5	1.08343e-08	-2.89477	0.002	0.033	0.000316718
AL353586.1	1.09115e-08	-3.10056	0.002	0.033	0.000318977
LRRK1	1.09238e-08	-0.64155	0.118	0.284	0.000319335
SRSF4	1.10551e-08	-0.399604	0.579	0.88	0.000323174
STYX	1.10683e-08	-0.476919	0.127	0.306	0.000323561
SRSF9	1.10888e-08	-0.426962	0.583	0.863	0.000324159
SRPK1	1.11278e-08	-0.50247	0.227	0.454	0.000325298
IL6ST	1.12065e-08	0.523324	0.925	0.94	0.000327599
ADAT1	1.12254e-08	-0.528965	0.113	0.279	0.000328153
IGLV2-23	1.1268e-08	-0.501129	0.005	0.049	0.000329398
SLC46A3	1.13226e-08	-0.528059	0.092	0.24	0.000330994
DLEU2	1.13458e-08	-0.429077	0.186	0.393	0.000331671
CASZ1	1.15275e-08	-0.504993	0.096	0.246	0.000336982
EIF3K	1.15909e-08	-0.345768	0.793	0.956	0.000338837
ELP5	1.15949e-08	-0.397194	0.201	0.421	0.000338954
C12orf57	1.17453e-08	-0.427125	0.522	0.803	0.00034335
DENND1A	1.18204e-08	-0.569522	0.096	0.246	0.000345545
NDUFB11	1.19091e-08	-0.40153	0.563	0.842	0.000348137
STAT5A	1.1991e-08	-0.544684	0.197	0.41	0.000350532
HDGF	1.20892e-08	-0.456711	0.397	0.689	0.000353404
PRR14	1.21052e-08	-0.27841	0.142	0.328	0.00035387
CEMIP2	1.23253e-08	-0.246683	0.443	0.749	0.000360307
DAP3	1.24144e-08	-0.311728	0.271	0.546	0.000362911
RGS3	1.24226e-08	-0.577632	0.269	0.514	0.000363151
NOP14	1.25824e-08	-0.408688	0.184	0.393	0.000367821
PDK1	1.2603e-08	-0.672232	0.066	0.191	0.000368424
PSMD14	1.29428e-08	-0.338321	0.226	0.464	0.000378357
PBDC1	1.29466e-08	-0.257801	0.215	0.454	0.000378467
NBEAL2	1.29658e-08	-0.402193	0.123	0.295	0.000379029
STAT5B	1.31438e-08	-0.363804	0.285	0.546	0.000384231
TMEM263	1.32079e-08	-0.314025	0.181	0.393	0.000386106
LINC00639	1.32429e-08	-1.28107	0.032	0.12	0.000387129
AC068888.2	1.33676e-08	-1.60682	0.012	0.071	0.000390776
LAGE3	1.34471e-08	-0.442697	0.229	0.464	0.0003931
UBE2W	1.35147e-08	-0.470829	0.223	0.459	0.000395075
RBM14	1.35709e-08	-0.518471	0.166	0.361	0.000396717
A1BG	1.35828e-08	-1.08215	0.039	0.137	0.000397066
AP001505.1	1.37706e-08	-1.51688	0.012	0.071	0.000402555
DCAF13	1.39243e-08	-0.300287	0.264	0.53	0.000407049
APRT	1.39273e-08	-0.404957	0.576	0.847	0.000407137
ATF5	1.39575e-08	-0.484568	0.136	0.317	0.000408019
MARK4	1.41763e-08	-0.591401	0.102	0.257	0.000414415
TMEM102	1.41836e-08	-0.535827	0.046	0.153	0.00041463
SLC7A6	1.43078e-08	-0.512043	0.129	0.301	0.000418259
PRR4	1.43139e-08	3.66569	0.207	0.038	0.000418439
BATF3	1.44785e-08	-0.880863	0.039	0.137	0.000423251
TAF13	1.4547e-08	-0.492347	0.149	0.333	0.000425253
XPO6	1.46543e-08	-0.577409	0.1	0.251	0.000428389
UTP18	1.46656e-08	-0.362988	0.166	0.366	0.00042872
AL035071.1	1.47792e-08	-0.738559	0.068	0.191	0.000432041
WDR43	1.48066e-08	-0.331158	0.26	0.514	0.000432841
FLRT2	1.54052e-08	1.47083	0.51	0.372	0.00045034
SENCR	1.54852e-08	-0.732852	0.127	0.295	0.000452678
MPLKIP	1.56506e-08	-0.413826	0.326	0.612	0.000457513
ZDHHC20	1.5694e-08	-0.272729	0.214	0.443	0.000458784
HIP1	1.57777e-08	-0.382236	0.423	0.743	0.00046123
ARL10	1.58862e-08	-0.860903	0.05	0.158	0.000464402
ZNF608	1.6176e-08	-0.305521	0.291	0.552	0.000472874
TTLL5	1.62152e-08	-0.435971	0.131	0.306	0.00047402
MYO1D	1.63985e-08	-0.199343	0.154	0.35	0.000479379
GFER	1.70342e-08	-0.434178	0.12	0.29	0.000497959
MAMSTR	1.70605e-08	-1.24318	0.032	0.12	0.00049873
WWC2	1.72333e-08	-0.327165	0.227	0.459	0.000503781
UBE2E1	1.76123e-08	-0.387492	0.266	0.525	0.00051486
GUCD1	1.77997e-08	-0.507755	0.152	0.339	0.000520339
ODAM	1.80425e-08	5.42948	0.151	0	0.000527435
ZNF468	1.81387e-08	-0.80028	0.058	0.175	0.000530247
RPL23A	1.82215e-08	-0.24396	0.98	1	0.00053267
METAP2	1.82452e-08	-0.369377	0.515	0.825	0.000533361
AC099568.2	1.82873e-08	-2.62266	0.003	0.038	0.000534592
TGM2	1.88361e-08	-0.502369	0.595	0.869	0.000550635
ATP5F1B	1.89933e-08	-0.401733	0.642	0.902	0.000555232
NUCKS1	1.90396e-08	0.451105	0.887	0.962	0.000556586
CMTR2	1.91002e-08	-0.284188	0.168	0.372	0.000558355
MAFF	1.91401e-08	-0.488057	0.25	0.47	0.000559523
TEAD2	1.91502e-08	-0.495506	0.202	0.415	0.000559818
COX16	1.9253e-08	-0.398358	0.426	0.721	0.000562822
XAF1	1.93402e-08	1.43362	0.621	0.596	0.000565371
HOXD8	1.93448e-08	-0.59222	0.29	0.536	0.000565506
SSBP4	1.94235e-08	-0.322499	0.346	0.628	0.000567808
ETF1	1.94334e-08	-0.382678	0.26	0.519	0.000568097
VARS2	1.95479e-08	-0.742281	0.047	0.153	0.000571443
OLA1	1.97579e-08	-0.446773	0.341	0.601	0.000577584
ZNF264	1.97723e-08	-0.19927	0.239	0.492	0.000578003
SDCBP2	1.97732e-08	-0.629808	0.066	0.191	0.000578031
LINC-PINT	1.98889e-08	-0.463763	0.448	0.743	0.000581411
PDCD2	1.99184e-08	-0.43623	0.318	0.59	0.000582273
TOMM34	1.9968e-08	-0.661953	0.084	0.224	0.000583725
RUVBL1	2.01459e-08	-0.307038	0.207	0.432	0.000588926
NOP16	2.02346e-08	-0.698362	0.101	0.251	0.000591517
DDHD1	2.02577e-08	-0.324511	0.163	0.361	0.000592195
TRIAP1	2.03299e-08	-0.436759	0.181	0.393	0.000594303
RIPK3	2.05149e-08	-1.20956	0.04	0.137	0.000599712
MTIF2	2.06055e-08	-0.618009	0.154	0.339	0.000602362
MCTS1	2.06489e-08	-0.240127	0.302	0.585	0.000603628
GARS	2.06939e-08	-0.329152	0.197	0.415	0.000604945
BX890604.2	2.10017e-08	-0.670118	0.085	0.224	0.000613942
CERS2	2.12265e-08	-0.302973	0.315	0.601	0.000620515
PPP1R13B	2.1342e-08	-0.404183	0.282	0.536	0.00062389
ADAMTS6	2.13743e-08	-0.182639	0.172	0.366	0.000624835
SPOCK1	2.14326e-08	3.62728	0.192	0.027	0.000626538
PGS1	2.14581e-08	-0.164173	0.141	0.328	0.000627284
TSR1	2.15062e-08	-0.382912	0.174	0.377	0.000628692
CNN3	2.16293e-08	0.535897	0.849	0.934	0.000632288
KCNK5	2.16456e-08	-0.924544	0.053	0.164	0.000632767
SOX12	2.17183e-08	-0.725419	0.077	0.208	0.00063489
CRADD	2.17584e-08	-0.690509	0.07	0.197	0.000636062
S100A13	2.19094e-08	-0.405579	0.71	0.945	0.000640478
BANF1	2.20394e-08	-0.420541	0.476	0.77	0.000644279
GSTO1	2.25249e-08	-0.378894	0.491	0.82	0.00065847
XRCC4	2.26526e-08	-0.492593	0.081	0.219	0.000662203
SERTAD4	2.27313e-08	-0.543905	0.111	0.268	0.000664503
MAFK	2.28735e-08	-0.559534	0.11	0.268	0.00066866
GNL1	2.30256e-08	-0.452025	0.282	0.541	0.000673106
KCNAB2	2.30314e-08	-1.31356	0.043	0.142	0.000673277
RPF1	2.31606e-08	-0.446276	0.207	0.426	0.000677053
SDHAF2	2.31741e-08	-0.274645	0.226	0.464	0.000677447
NFIA	2.32453e-08	0.643121	0.858	0.923	0.000679529
FOXC2	2.34586e-08	4.8176	0.158	0.005	0.000685766
ST6GALNAC1	2.35577e-08	-0.379185	0.163	0.355	0.000688662
PRPF19	2.37363e-08	-0.372741	0.171	0.372	0.000693883
PTOV1	2.39667e-08	-0.359313	0.221	0.454	0.000700617
ID2	2.41051e-08	1.53635	0.555	0.497	0.000704665
ARID3A	2.41349e-08	-1.20485	0.032	0.12	0.000705537
NPLOC4	2.42673e-08	-0.360746	0.19	0.404	0.000709405
SEPHS2	2.44327e-08	-0.502462	0.317	0.579	0.00071424
EIF4E	2.44432e-08	-0.502899	0.25	0.486	0.000714549
RIT1	2.46547e-08	-0.48293	0.203	0.421	0.000720732
GEMIN4	2.48758e-08	-0.455396	0.058	0.175	0.000727195
FOXO3	2.51095e-08	1.42241	0.572	0.519	0.000734025
AARSD1	2.52814e-08	-0.411487	0.165	0.361	0.00073905
RTL8A	2.58981e-08	-0.359224	0.248	0.486	0.00075708
FOXK2	2.62151e-08	-0.411542	0.14	0.317	0.000766347
TNPO1	2.62557e-08	-0.345207	0.44	0.781	0.000767534
RARA-AS1	2.63514e-08	-0.685947	0.083	0.219	0.000770331
SOCS4	2.67333e-08	-0.186497	0.177	0.388	0.000781494
UBE2E3	2.67342e-08	-0.32147	0.389	0.705	0.000781522
PPRC1	2.68501e-08	-0.925617	0.078	0.208	0.00078491
COPZ1	2.68859e-08	-0.299366	0.333	0.639	0.000785955
MGAT4A	2.71051e-08	-0.32449	0.482	0.798	0.000792365
PDLIM5	2.7336e-08	-0.356272	0.545	0.863	0.000799112
AIMP2	2.75354e-08	-0.420298	0.096	0.246	0.000804941
LDLRAP1	2.78327e-08	-0.417107	0.113	0.273	0.000813633
GSTM3	2.787e-08	-0.486507	0.106	0.262	0.000814723
ERI1	2.83584e-08	-0.538799	0.082	0.219	0.000829002
METTL1	2.84628e-08	-0.994996	0.056	0.169	0.000832053
AKT1S1	2.85116e-08	-0.433817	0.148	0.333	0.00083348
GTPBP4	2.88685e-08	-0.190892	0.267	0.536	0.000843912
MMADHC	2.88751e-08	-0.307606	0.318	0.601	0.000844106
DHX29	2.88952e-08	-0.322904	0.283	0.536	0.000844694
RAB11A	2.91041e-08	-0.429463	0.716	0.923	0.000850799
NABP1	2.91956e-08	-0.318108	0.148	0.333	0.000853474
SCFD2	2.9211e-08	-0.806885	0.059	0.175	0.000853927
GPRIN3	2.92557e-08	-1.16165	0.028	0.109	0.000855233
ELFN1	2.92557e-08	-1.21474	0.028	0.109	0.000855233
AC002558.3	2.93199e-08	-0.606165	0.077	0.208	0.000857109
CCAR1	2.97962e-08	-0.388561	0.377	0.661	0.000871033
TRABD	2.99764e-08	-0.256424	0.199	0.415	0.0008763
HSPA4	3.01386e-08	-0.217337	0.27	0.53	0.000881042
LRRC41	3.03102e-08	-0.376376	0.199	0.415	0.000886058
PPIF	3.03163e-08	-0.985126	0.032	0.12	0.000886236
SH3TC2	3.05717e-08	-0.955417	0.028	0.109	0.000893704
SNRPB	3.08614e-08	-0.469437	0.549	0.842	0.00090217
MRPL28	3.13113e-08	-0.351606	0.275	0.525	0.000915324
IFITM1	3.16351e-08	-0.394227	0.659	0.891	0.000924788
FAM122B	3.16593e-08	-0.469588	0.115	0.273	0.000925497
FAM92A	3.21003e-08	-0.661052	0.107	0.262	0.000938389
MECOM	3.21373e-08	-0.507464	0.42	0.694	0.000939469
SOX5	3.21615e-08	-1.26605	0.021	0.093	0.000940177
CRISPLD1	3.23572e-08	-0.698255	0.101	0.246	0.000945898
CLTB	3.28155e-08	-0.338664	0.411	0.716	0.000959297
TMSB4X	3.28618e-08	0.263086	0.989	1	0.000960649
RPP25L	3.31693e-08	-0.547794	0.151	0.333	0.000969639
MAGI1-IT1	3.33723e-08	-1.42986	0.017	0.082	0.000975574
CTTNBP2	3.41115e-08	3.54732	0.194	0.033	0.000997183
MBOAT7	3.49084e-08	-0.380162	0.151	0.339	0.00102048
GPATCH4	3.55138e-08	-0.494285	0.203	0.41	0.00103818
MYBBP1A	3.57764e-08	-0.268584	0.143	0.328	0.00104585
PEX10	3.57769e-08	-0.270612	0.129	0.306	0.00104587
PALM	3.58782e-08	-0.493018	0.184	0.383	0.00104883
DPY19L1	3.60609e-08	-0.166904	0.16	0.361	0.00105417
SLC20A1	3.6135e-08	-0.339442	0.232	0.454	0.00105634
NR4A2	3.63513e-08	-0.653251	0.37	0.623	0.00106266
TMEM201	3.65078e-08	-0.877095	0.048	0.153	0.00106723
NUDT22	3.68366e-08	-0.405841	0.127	0.295	0.00107684
DANCR	3.75548e-08	-0.35465	0.272	0.525	0.00109784
TRAF4	3.75882e-08	-0.454175	0.083	0.219	0.00109882
OPTN	3.77714e-08	-0.476893	0.418	0.705	0.00110417
RPL11	3.81028e-08	-0.246411	0.992	1	0.00111386
FASN	3.81718e-08	-0.484302	0.056	0.169	0.00111588
SH3BGRL3	3.85771e-08	-0.400349	0.746	0.973	0.00112772
AC110611.2	3.86076e-08	-0.459067	0.117	0.279	0.00112862
NAXE	3.91504e-08	-0.29592	0.189	0.399	0.00114448
CD59	3.91838e-08	-0.394899	0.952	1	0.00114546
PDE10A	3.93751e-08	-0.354114	0.163	0.355	0.00115105
CPNE2	3.94959e-08	-0.3709	0.34	0.617	0.00115458
TMC7	4.02533e-08	-0.457141	0.065	0.186	0.00117673
DLG4	4.02892e-08	-0.63462	0.065	0.186	0.00117777
AC124283.1	4.05348e-08	-1.23578	0.026	0.104	0.00118495
DAZAP1	4.06116e-08	-0.235243	0.282	0.552	0.0011872
ATG4A	4.06804e-08	-0.605455	0.102	0.251	0.00118921
RPL24	4.09299e-08	-0.264884	0.978	1	0.0011965
CCDC102A	4.13249e-08	-0.832596	0.096	0.24	0.00120805
IRF2BPL	4.14353e-08	-0.594342	0.193	0.388	0.00121128
RNPEPL1	4.16427e-08	-0.555138	0.273	0.508	0.00121734
MAGOHB	4.18174e-08	-0.30473	0.154	0.344	0.00122245
PPP2R5A	4.22677e-08	-0.33781	0.405	0.71	0.00123561
RAE1	4.22784e-08	-0.447387	0.12	0.284	0.00123592
AC087190.1	4.24643e-08	-0.599343	0.051	0.158	0.00124136
RAB11FIP1	4.26661e-08	2.19442	0.252	0.077	0.00124726
YPEL5	4.2818e-08	-0.294139	0.332	0.612	0.0012517
STX3	4.32672e-08	-0.293464	0.11	0.268	0.00126483
FAAP100	4.34289e-08	-0.784631	0.086	0.224	0.00126956
GSK3A	4.38962e-08	-0.425966	0.204	0.415	0.00128322
CNOT6L	4.40256e-08	-0.333447	0.451	0.776	0.001287
PPP4C	4.41832e-08	-0.388658	0.346	0.623	0.00129161
ZNF700	4.45728e-08	-0.475741	0.075	0.202	0.001303
RBM10	4.45993e-08	-0.276757	0.171	0.372	0.00130377
GBE1	4.49178e-08	-0.490985	0.118	0.279	0.00131308
GALE	4.59032e-08	-0.551938	0.136	0.311	0.00134189
AC100821.2	4.64156e-08	-3.62962	0.001	0.027	0.00135687
PGAM5	4.64988e-08	-0.505691	0.071	0.197	0.0013593
ADAMTS1	4.66438e-08	-0.391307	0.488	0.749	0.00136354
HNRNPF	4.66535e-08	-0.382921	0.611	0.88	0.00136382
HMCN1	4.67336e-08	-0.669164	0.049	0.153	0.00136616
MRPL33	4.68888e-08	-0.399437	0.549	0.842	0.0013707
CAMTA2	4.69669e-08	-0.223104	0.13	0.301	0.00137298
CBR1	4.7281e-08	-0.200525	0.127	0.295	0.00138216
FAM222B	4.84021e-08	-0.408812	0.154	0.339	0.00141494
AGFG2	4.88184e-08	-0.671711	0.103	0.251	0.00142711
NFKBID	4.91635e-08	-0.640952	0.123	0.279	0.0014372
NXF1	4.95168e-08	-0.292613	0.173	0.372	0.00144752
BPIFB2	4.96106e-08	4.81491	0.151	0.005	0.00145027
TPBG	5.06484e-08	-0.361248	0.187	0.388	0.0014806
TMEM100	5.10405e-08	-1.52585	0.026	0.104	0.00149207
BCR	5.11894e-08	-0.183219	0.308	0.585	0.00149642
SFT2D2	5.16914e-08	-0.304296	0.376	0.672	0.00151109
DNAH5	5.21255e-08	5.13975	0.159	0.011	0.00152379
IMP4	5.21534e-08	-0.291918	0.265	0.508	0.0015246
ADAMTS18	5.25099e-08	-1.17019	0.039	0.131	0.00153502
DGCR6L	5.25638e-08	-0.302847	0.246	0.492	0.0015366
PACS1	5.28382e-08	-0.365752	0.238	0.47	0.00154462
LINC00513	5.30241e-08	-0.717308	0.051	0.158	0.00155005
STK25	5.33008e-08	-0.230379	0.346	0.634	0.00155814
PBX3	5.33389e-08	-0.576573	0.083	0.219	0.00155926
ABCF2	5.35672e-08	-0.391676	0.141	0.317	0.00156593
CHMP1B	5.36135e-08	-0.379708	0.273	0.514	0.00156728
GAA	5.38081e-08	-0.324695	0.229	0.459	0.00157297
SLC16A7	5.39809e-08	-0.480967	0.18	0.377	0.00157802
GBA	5.41327e-08	-0.738157	0.097	0.24	0.00158246
NETO2	5.42139e-08	-1.90717	0.013	0.071	0.00158483
PRDX4	5.47195e-08	-0.50562	0.494	0.781	0.00159961
ABCF1	5.48397e-08	-0.339191	0.27	0.53	0.00160313
NDUFA8	5.48998e-08	-0.364739	0.411	0.71	0.00160489
CBX8	5.56245e-08	-1.14302	0.015	0.077	0.00162607
AC147067.2	5.61222e-08	-2.03533	0.013	0.071	0.00164062
RPL23	5.6376e-08	-0.270068	0.963	1	0.00164804
STN1	5.64382e-08	-0.418469	0.216	0.426	0.00164986
MPV17	5.65391e-08	-0.217961	0.224	0.464	0.00165281
FARSA	5.67501e-08	-0.384125	0.141	0.317	0.00165897
CPQ	5.79012e-08	-0.500736	0.19	0.393	0.00169263
RBFA	5.86407e-08	-0.413315	0.165	0.355	0.00171424
IGFBP7	5.89422e-08	-0.517391	0.966	0.995	0.00172306
NPY1R	5.89852e-08	-2.48417	0.01	0.06	0.00172431
VPS37B	5.91662e-08	-0.191804	0.299	0.557	0.0017296
RPL29	5.986e-08	-0.235343	0.984	1	0.00174989
GNA12	5.99384e-08	-0.11801	0.165	0.366	0.00175218
MIR4435-2HG	6.06195e-08	-0.972922	0.077	0.202	0.00177209
PFKFB3	6.12991e-08	-0.668091	0.092	0.23	0.00179196
VKORC1	6.14026e-08	-0.369347	0.461	0.749	0.00179498
CYCS	6.16156e-08	-0.424853	0.417	0.727	0.00180121
NUDCD2	6.25228e-08	-0.319159	0.335	0.628	0.00182773
TADA3	6.30215e-08	-0.304253	0.195	0.404	0.00184231
RGCC	6.30782e-08	1.66095	0.443	0.268	0.00184396
C11orf91	6.33462e-08	-1.55934	0.008	0.055	0.0018518
GGT5	6.3419e-08	-0.309414	0.388	0.656	0.00185393
AP3S1	6.3549e-08	-0.424357	0.358	0.634	0.00185773
RHOBTB2	6.39654e-08	-0.970292	0.067	0.186	0.0018699
PAICS	6.42334e-08	-0.367488	0.141	0.311	0.00187773
AC008906.1	6.44276e-08	-1.25116	0.013	0.071	0.00188341
DHDDS	6.4887e-08	-0.521316	0.099	0.246	0.00189684
TP53I3	6.5004e-08	-0.669666	0.118	0.273	0.00190026
ZDHHC9	6.52456e-08	-0.518338	0.133	0.301	0.00190733
RPIA	6.54297e-08	-0.469932	0.215	0.432	0.00191271
IGLV1-47	6.55025e-08	-2.92823	0.005	0.044	0.00191484
ZSWIM8	6.67703e-08	-0.390301	0.17	0.361	0.0019519
PLCXD3	6.69493e-08	1.51183	0.285	0.098	0.00195713
MRPS18A	6.70462e-08	-0.372831	0.14	0.317	0.00195996
DENND4B	6.84195e-08	-0.506009	0.121	0.279	0.00200011
CIC	6.86484e-08	-0.371293	0.233	0.464	0.0020068
EPN1	6.89624e-08	-0.408218	0.388	0.672	0.00201598
PTPA	6.93355e-08	-0.360033	0.211	0.426	0.00202688
BST2	6.95847e-08	1.05201	0.717	0.732	0.00203417
KLF6	6.9916e-08	0.658351	0.843	0.923	0.00204386
RABEP2	6.9947e-08	-0.386413	0.118	0.279	0.00204476
NCLN	7.1492e-08	-0.45672	0.101	0.246	0.00208993
LMNB1	7.16413e-08	-1.37274	0.024	0.098	0.00209429
TMEM127	7.18285e-08	-0.40903	0.241	0.464	0.00209976
NAV1	7.19142e-08	-0.276208	0.236	0.464	0.00210227
CTDNEP1	7.27855e-08	-0.338518	0.352	0.639	0.00212774
GPI	7.29923e-08	-0.272106	0.3	0.574	0.00213378
UBE2N	7.33297e-08	-0.329032	0.327	0.596	0.00214365
SMARCAL1	7.41959e-08	-0.571151	0.069	0.191	0.00216897
CHCHD2	7.42802e-08	-0.316064	0.829	0.956	0.00217143
MT1E	7.437e-08	3.28659	0.258	0.093	0.00217406
TAF10	7.47974e-08	-0.3561	0.379	0.672	0.00218655
UNC119B	7.49182e-08	-0.37923	0.114	0.268	0.00219008
RNF44	7.49827e-08	-0.320498	0.166	0.355	0.00219197
UBE2T	7.50832e-08	-0.935431	0.022	0.093	0.00219491
EOGT	7.53351e-08	-0.298701	0.196	0.399	0.00220227
AC004854.2	7.54473e-08	-1.82962	0.01	0.06	0.00220555
EBNA1BP2	7.54565e-08	-0.372631	0.257	0.486	0.00220582
AC104695.3	7.59663e-08	-0.662583	0.063	0.18	0.00222072
ASPH	7.6137e-08	-0.323714	0.612	0.891	0.00222571
LIPG	7.62101e-08	-1.65696	0.011	0.066	0.00222785
HIPK3	7.65567e-08	-0.416115	0.566	0.831	0.00223798
AL365295.1	7.7225e-08	-0.860141	0.068	0.186	0.00225752
LINC02147	7.74311e-08	-0.550449	0.194	0.388	0.00226354
TMEM273	7.75654e-08	-0.390258	0.439	0.699	0.00226747
NCBP2AS2	7.78042e-08	-0.169295	0.224	0.464	0.00227445
AF064858.1	7.80191e-08	-1.30382	0.026	0.104	0.00228073
SRA1	7.83023e-08	-0.264047	0.224	0.448	0.00228901
DFFA	7.8307e-08	-0.315852	0.269	0.519	0.00228915
COX20	7.87035e-08	-0.385511	0.377	0.656	0.00230074
HTRA2	7.90327e-08	-0.195448	0.211	0.432	0.00231036
RAB29	7.93759e-08	-0.492695	0.187	0.377	0.0023204
SUB1	7.964e-08	-0.359605	0.666	0.896	0.00232812
ATP5MC2	8.00832e-08	-0.320423	0.82	0.984	0.00234107
PLA2G12A	8.30291e-08	-0.368181	0.215	0.426	0.00242719
PUSL1	8.33199e-08	-0.94491	0.044	0.142	0.00243569
LINC00963	8.36646e-08	-0.416191	0.29	0.536	0.00244577
TTC4	8.51523e-08	-0.727849	0.115	0.268	0.00248926
UGGT1	8.51978e-08	-0.275084	0.19	0.399	0.00249059
SEH1L	8.54521e-08	-0.696774	0.104	0.251	0.00249802
PIGT	8.61574e-08	-0.355462	0.32	0.585	0.00251864
TAP1	8.74507e-08	-0.290086	0.417	0.738	0.00255645
S100A4	8.78965e-08	-1.50408	0.183	0.366	0.00256948
NOA1	8.86751e-08	-0.21784	0.165	0.361	0.00259224
PSMA5	8.89745e-08	-0.322994	0.363	0.639	0.00260099
KDELR3	8.89776e-08	-0.696184	0.064	0.18	0.00260108
IFI16	8.93877e-08	-0.357743	0.786	0.956	0.00261307
LRG1	9.00387e-08	-0.494071	0.08	0.208	0.0026321
COL8A2	9.01893e-08	-1.57797	0.022	0.093	0.0026365
COA4	9.14221e-08	-0.476628	0.311	0.552	0.00267254
PPM1F	9.19353e-08	-0.273842	0.388	0.705	0.00268755
CNOT9	9.29687e-08	-0.42619	0.159	0.339	0.00271775
AC099811.5	9.30867e-08	-3.63365	0.004	0.038	0.0027212
METTL9	9.31078e-08	-0.368294	0.481	0.77	0.00272182
TPI1	9.38749e-08	-0.404921	0.629	0.907	0.00274424
RPL32	9.42136e-08	-0.230042	0.99	1	0.00275414
GLTP	9.56344e-08	-0.352802	0.288	0.536	0.00279568
SNAP29	9.64551e-08	-0.362954	0.229	0.459	0.00281967
TRIB1	9.69317e-08	-0.558806	0.177	0.361	0.00283361
CHST7	9.701e-08	-0.408544	0.15	0.328	0.00283589
ATG7	9.72922e-08	-0.546197	0.126	0.29	0.00284414
TMUB1	9.81147e-08	-0.272494	0.154	0.339	0.00286819
MRPS25	9.87834e-08	-0.125441	0.234	0.47	0.00288773
VPS26B	9.8964e-08	-0.623313	0.118	0.273	0.00289301
TMEM39B	9.89726e-08	-0.273083	0.176	0.377	0.00289326
PCDH1	9.90332e-08	-0.117673	0.294	0.552	0.00289504
EBPL	9.93032e-08	-0.421181	0.508	0.787	0.00290293
PIAS2	9.93456e-08	-0.196077	0.27	0.525	0.00290417
GTF2F1	1.00264e-07	-0.325466	0.304	0.568	0.00293103
RAI2	1.00962e-07	-0.379037	0.114	0.268	0.00295141
MN1	1.01913e-07	-1.14604	0.037	0.126	0.00297921
KHSRP	1.0267e-07	-0.350966	0.335	0.607	0.00300135
TMTC4	1.02824e-07	-0.164207	0.12	0.284	0.00300587
TMEM86A	1.02851e-07	-2.63914	0.004	0.038	0.00300666
MTMR2	1.02963e-07	-0.385079	0.154	0.333	0.00300992
DOC2B	1.03638e-07	-0.362304	0.391	0.678	0.00302966
ARPC2	1.04232e-07	-0.358862	0.761	0.94	0.00304702
UCHL3	1.0431e-07	-0.252268	0.137	0.311	0.00304928
COX4I1	1.06193e-07	-0.327832	0.813	0.951	0.00310435
SNX22	1.0624e-07	-2.55944	0.002	0.033	0.0031057
MMP17	1.06911e-07	-2.62146	0.002	0.033	0.00312532
BIRC3	1.07362e-07	-0.584354	0.238	0.459	0.00313853
SZT2	1.07957e-07	-0.477768	0.135	0.301	0.0031559
HS2ST1	1.08309e-07	-0.343219	0.182	0.372	0.00316619
ABCA1	1.09028e-07	-0.894608	0.066	0.18	0.00318722
AQP3	1.09893e-07	-0.557419	0.223	0.426	0.0032125
RPL21	1.10111e-07	-0.239629	0.981	1	0.00321887
EIPR1	1.12086e-07	-0.550629	0.092	0.23	0.0032766
C11orf88	1.12181e-07	6.16731	0.136	0	0.00327938
PHKG2	1.1252e-07	-0.657204	0.074	0.197	0.0032893
B3GNT5	1.12828e-07	-0.526522	0.065	0.18	0.00329831
CAPRIN2	1.13197e-07	-0.769448	0.083	0.213	0.0033091
AKR1C3	1.13251e-07	0.958154	0.69	0.678	0.00331067
FGF11	1.13691e-07	-1.8158	0.018	0.082	0.00332354
FAM49B	1.13696e-07	-0.424036	0.144	0.317	0.00332368
AFMID	1.15682e-07	-0.644571	0.116	0.268	0.00338174
PPP1R37	1.15857e-07	-0.373605	0.114	0.268	0.00338685
SRCAP	1.16614e-07	-0.222708	0.166	0.361	0.00340899
NNT	1.16692e-07	-0.403885	0.185	0.377	0.00341124
RNF10	1.17246e-07	-0.420561	0.322	0.574	0.00342745
DTD1	1.17363e-07	-0.26373	0.289	0.546	0.00343087
ATG101	1.17891e-07	-0.331996	0.193	0.399	0.0034463
PTPRJ	1.18499e-07	-1.6167	0.03	0.109	0.00346409
NDRG4	1.19446e-07	2.25348	0.225	0.06	0.00349178
BOLA2	1.20307e-07	-0.552526	0.18	0.366	0.00351694
IDUA	1.20495e-07	-0.669356	0.062	0.175	0.00352244
CBFB	1.20557e-07	-0.417876	0.152	0.328	0.00352423
DERA	1.21248e-07	-0.348857	0.196	0.404	0.00354443
DDX19A	1.22279e-07	-0.200964	0.185	0.388	0.00357459
AC016831.1	1.22494e-07	-0.795565	0.048	0.148	0.00358086
GTF3A	1.22542e-07	-0.351959	0.446	0.754	0.00358227
ZBTB7A	1.24087e-07	-0.39755	0.57	0.852	0.00362744
CDK5	1.24177e-07	-0.634809	0.051	0.153	0.00363006
DSG2	1.24401e-07	2.8362	0.213	0.055	0.00363662
DDA1	1.24461e-07	-0.578758	0.127	0.284	0.00363837
FTSJ3	1.24491e-07	-0.171631	0.192	0.399	0.00363926
CTSH	1.24593e-07	-0.326539	0.648	0.891	0.00364223
DUSP14	1.26625e-07	-0.585471	0.083	0.213	0.00370162
NOVA2	1.282e-07	-0.431496	0.325	0.574	0.00374766
C1QTNF6	1.29722e-07	-1.13452	0.035	0.12	0.00379217
SELE	1.29772e-07	-0.421378	0.218	0.41	0.00379362
LARP6	1.30675e-07	-0.427156	0.117	0.273	0.00382002
BMERB1	1.31199e-07	-0.234303	0.221	0.443	0.00383533
KCMF1	1.31644e-07	-0.220427	0.25	0.492	0.00384834
MCM7	1.32214e-07	-0.621445	0.157	0.333	0.00386502
ICMT	1.33587e-07	-0.173919	0.192	0.399	0.00390514
MRPL1	1.34996e-07	-0.247128	0.194	0.399	0.00394634
MGAT2	1.38899e-07	-0.244829	0.164	0.355	0.00406042
RNPEP	1.39037e-07	-0.296168	0.152	0.333	0.00406446
PDCL3	1.40258e-07	-0.257614	0.178	0.377	0.00410015
GK5	1.40542e-07	-0.233029	0.193	0.393	0.00410846
SUCNR1	1.40945e-07	-4.62144	0.001	0.022	0.00412023
PIFO	1.421e-07	5.10993	0.143	0.005	0.00415402
IGLV7-43	1.42192e-07	-4.64263	0.001	0.022	0.0041567
ARHGEF15	1.42448e-07	-0.27892	0.4	0.683	0.00416419
STK10	1.42748e-07	-0.255334	0.172	0.366	0.00417296
USP12	1.43189e-07	-0.262737	0.198	0.41	0.00418585
HGC6.3	1.4345e-07	-3.99407	0.001	0.022	0.00419347
SLC25A34-AS1	1.4345e-07	-4.25425	0.001	0.022	0.00419347
AL158835.1	1.4345e-07	-4.48566	0.001	0.022	0.00419347
APBB2	1.43637e-07	-0.201175	0.342	0.634	0.00419893
BLMH	1.4397e-07	-0.179621	0.245	0.486	0.00420867
NLRP3	1.44719e-07	-3.94033	0.001	0.022	0.00423056
AL731559.1	1.44719e-07	-3.16018	0.001	0.022	0.00423056
RPS6KA4	1.45147e-07	-0.474112	0.089	0.224	0.00424308
AATF	1.45221e-07	-0.188809	0.223	0.454	0.00424524
EGLN1	1.47142e-07	-0.35309	0.568	0.836	0.00430141
SOD2	1.47708e-07	-0.722138	0.467	0.71	0.00431795
RBM15B	1.47854e-07	-0.476944	0.135	0.295	0.00432221
SEC13	1.49898e-07	-0.11658	0.208	0.432	0.00438196
PSMB2	1.50063e-07	-0.427223	0.441	0.721	0.0043868
IFT43	1.50161e-07	-0.186511	0.278	0.525	0.00438966
PHPT1	1.5048e-07	-0.350344	0.431	0.727	0.00439899
STXBP6	1.5201e-07	4.60697	0.15	0.011	0.0044437
NECAP2	1.53414e-07	-0.296639	0.304	0.568	0.00448474
MIER2	1.53887e-07	-0.783166	0.092	0.224	0.00449858
PTRHD1	1.54853e-07	-0.462261	0.236	0.454	0.00452683
TSPAN18	1.55371e-07	1.02117	0.628	0.607	0.00454196
FILIP1	1.56631e-07	-0.565535	0.369	0.596	0.00457879
SRP19	1.56982e-07	-0.319755	0.362	0.656	0.00458906
ZNF714	1.57771e-07	-0.364567	0.074	0.197	0.00461211
SRPRB	1.59186e-07	-0.353246	0.181	0.377	0.00465348
SCRIB	1.61214e-07	-0.344217	0.111	0.262	0.00471276
RASGRF2-AS1	1.61394e-07	-2.06031	0.008	0.055	0.00471804
CNOT7	1.6187e-07	-0.234229	0.301	0.568	0.00473195
INTS14	1.62697e-07	-0.214802	0.135	0.306	0.00475613
DUXAP8	1.6302e-07	-1.18703	0.023	0.093	0.00476556
YIF1A	1.63223e-07	-0.345457	0.253	0.475	0.00477151
PUS1	1.63459e-07	-0.670018	0.065	0.18	0.00477841
PACS2	1.64158e-07	-0.327633	0.248	0.492	0.00479883
MAST4-IT1	1.64401e-07	-5.006	0	0.016	0.00480594
IGF2BP3	1.64401e-07	-4.29491	0	0.016	0.00480594
LINP1	1.64401e-07	-4.72492	0	0.016	0.00480594
OR5AS1	1.64401e-07	-4.96202	0	0.016	0.00480594
IGHV3-11	1.64401e-07	-4.83991	0	0.016	0.00480594
IGHV1-24	1.64401e-07	-5.33994	0	0.016	0.00480594
IGHV3-66	1.64401e-07	-4.98925	0	0.016	0.00480594
IGHV1-69D	1.64401e-07	-4.62134	0	0.016	0.00480594
AC020978.1	1.64401e-07	-4.91277	0	0.016	0.00480594
SERPINB2	1.64401e-07	-4.49788	0	0.016	0.00480594
SERPINB10	1.64401e-07	-4.3675	0	0.016	0.00480594
LILRA4	1.64401e-07	-4.5101	0	0.016	0.00480594
PLCB1-IT1	1.64401e-07	-4.75432	0	0.016	0.00480594
CLDN14	1.64401e-07	-4.67669	0	0.016	0.00480594
IGLV8-61	1.64401e-07	-5.37809	0	0.016	0.00480594
IGHEP1	1.64401e-07	-4.63373	0	0.016	0.00480594
AL359834.1	1.64401e-07	-4.40391	0	0.016	0.00480594
TNK2	1.66839e-07	-0.283208	0.102	0.246	0.00487722
MSRB2	1.67439e-07	-0.286883	0.244	0.475	0.00489476
LITAF	1.67605e-07	-0.421965	0.384	0.656	0.0048996
UQCRH	1.68375e-07	-0.343511	0.725	0.907	0.00492212
PAXX	1.68638e-07	-0.156931	0.336	0.639	0.0049298
MTA1	1.6872e-07	-0.369464	0.234	0.454	0.00493219
ARF6	1.69031e-07	-0.339416	0.411	0.705	0.00494128
MEF2D	1.70407e-07	-0.382199	0.182	0.372	0.0049815
WDR74	1.70503e-07	-0.277786	0.211	0.426	0.00498433
GABRD	1.70877e-07	-2.15747	0.01	0.06	0.00499524
ABCC1	1.71081e-07	-0.790277	0.09	0.224	0.00500121
IMPG2	1.71428e-07	-2.052	0.008	0.055	0.00501135
NR2F1-AS1	1.71566e-07	2.959	0.229	0.071	0.0050154
TOLLIP	1.73252e-07	-0.50766	0.141	0.306	0.00506468
NKTR	1.7385e-07	0.778431	0.797	0.858	0.00508215
B3GNT3	1.74051e-07	-1.69369	0.016	0.077	0.00508803
P2RY2	1.74087e-07	-1.82514	0.01	0.06	0.00508907
IL6R	1.75825e-07	-0.654958	0.122	0.273	0.0051399
NFE2L3	1.77857e-07	-0.794975	0.098	0.235	0.0051993
CHIC2	1.77929e-07	-0.271774	0.217	0.437	0.00520138
FASTK	1.78119e-07	-0.105782	0.188	0.399	0.00520696
EPHX1	1.78867e-07	0.805639	0.73	0.803	0.00522883
FGD1	1.79645e-07	-1.00157	0.038	0.126	0.00525156
WDR46	1.79919e-07	-0.457168	0.196	0.393	0.00525958
DLEU1	1.80877e-07	-0.488346	0.074	0.197	0.00528757
INTS9	1.81959e-07	-0.876893	0.057	0.164	0.0053192
SLCO2B1	1.83103e-07	-0.506845	0.275	0.497	0.00535264
PTDSS2	1.83341e-07	-0.6773	0.088	0.219	0.00535962
NKIRAS2	1.84062e-07	-0.312068	0.208	0.421	0.0053807
MYH10	1.8524e-07	1.57466	0.376	0.219	0.00541511
SNTN	1.85709e-07	5.92962	0.132	0	0.00542882
CASP10	1.87351e-07	-0.286621	0.267	0.503	0.00547685
SETD1A	1.89479e-07	-0.422446	0.095	0.235	0.00553903
OGFOD3	1.90374e-07	-0.284971	0.157	0.339	0.0055652
DAPK3	1.9097e-07	-0.276694	0.139	0.306	0.00558264
NOLC1	1.9098e-07	-0.348539	0.233	0.448	0.00558293
POLG2	1.96433e-07	-0.246462	0.162	0.344	0.00574232
ZC3H18	1.97664e-07	-0.267901	0.236	0.464	0.00577832
[truncated: 1,084 more rows]

## Sheet: SERPINE1+ Fibroblast
Unnamed: 0	p_val	avg_log2FC	pct.1	pct.2	p_val_adj
SCGB1A1	7.05179e-39	11.1441	0.895	0.006	2.06145e-34
BPIFA1	1.17115e-34	8.09912	0.921	0.048	3.42361e-30
SLPI	3.69944e-22	5.12806	0.947	0.303	1.08146e-17
IGKC	1.80566e-21	-4.0914	0.737	1	5.2785e-17
PTN	1.48027e-20	4.55041	0.974	0.539	4.32727e-16
IGHG4	3.76262e-20	-5.91181	0.158	0.976	1.09993e-15
JCHAIN	3.71234e-17	-4.61385	0.105	0.933	1.08523e-12
TPM2	1.04155e-16	-2.58778	0.737	0.988	3.04477e-12
IGHA1	1.0905e-16	-3.23742	0.5	0.988	3.18787e-12
NABP1	3.74757e-16	-4.58941	0.105	0.897	1.09553e-11
TMSB4X	5.22567e-16	-1.44276	1	0.994	1.52762e-11
SCGB3A1	9.97203e-16	6.68571	0.395	0.006	2.91512e-11
IGLC2	1.0471e-14	-2.89222	0.368	0.976	3.06098e-10
PAPPA	2.52513e-14	-2.88103	0.184	0.903	7.38171e-10
MIF	3.00441e-14	-1.73768	0.789	0.988	8.7828e-10
ZG16B	1.49369e-13	8.83924	0.342	0.006	4.3665e-09
EFEMP1	1.75145e-13	-3.04641	0.184	0.885	5.12e-09
CYTOR	2.44725e-13	-2.84139	0.211	0.879	7.15406e-09
SPARCL1	4.08793e-13	6.21383	0.579	0.115	1.19502e-08
SULF1	6.74693e-13	-2.21928	0.342	0.958	1.97233e-08
OGN	1.42867e-12	8.32141	0.289	0	4.17643e-08
C11orf88	1.42867e-12	7.06046	0.289	0	4.17643e-08
POSTN	1.79436e-12	-1.93936	0.605	0.994	5.24545e-08
C9orf24	1.90836e-12	6.4592	0.316	0.006	5.5787e-08
MIDN	2.96165e-12	-2.93559	0.132	0.824	8.65779e-08
VGLL3	3.08455e-12	-3.93663	0.079	0.764	9.01706e-08
FN1	3.35518e-12	-2.0486	0.684	0.982	9.80821e-08
CCL26	4.16995e-12	-9.08343	0	0.691	1.219e-07
MIR4435-2HG	4.78186e-12	-2.85627	0.105	0.806	1.39788e-07
THY1	7.76616e-12	-1.67188	0.684	0.976	2.27028e-07
GAPDH	1.03287e-11	-1.87906	0.789	0.982	3.01938e-07
CRABP1	1.25902e-11	-3.37191	0.105	0.788	3.68049e-07
KCNMB1	1.70581e-11	5.38127	0.342	0.018	4.9866e-07
TNN	1.83823e-11	6.37712	0.316	0.012	5.37369e-07
RSPH1	2.14724e-11	6.45411	0.289	0.006	6.27701e-07
PLOD2	2.19169e-11	-3.03724	0.289	0.842	6.40695e-07
MYL9	2.39418e-11	-2.18753	0.553	0.958	6.9989e-07
CRABP2	3.59403e-11	-1.99065	0.289	0.921	1.05064e-06
IGHG1	3.6994e-11	-4.04025	0.053	0.721	1.08145e-06
IGHA2	3.91572e-11	-3.22805	0.211	0.824	1.14468e-06
LOXL1	4.06832e-11	-2.24373	0.289	0.873	1.18929e-06
MEGF6	4.34228e-11	-3.82443	0.053	0.709	1.26938e-06
LINC00578	4.51154e-11	-3.0272	0.053	0.715	1.31886e-06
STATH	5.21239e-11	8.58416	0.395	0.042	1.52374e-06
GAS1	5.60583e-11	-2.71955	0.184	0.818	1.63875e-06
LOXL2	6.28451e-11	-3.55969	0.132	0.764	1.83715e-06
BPIFB1	7.38864e-11	4.90479	0.553	0.139	2.15992e-06
MYL6	8.13485e-11	-1.26861	0.921	1	2.37806e-06
CRIM1	9.22948e-11	-1.95365	0.263	0.903	2.69805e-06
SEC61G	9.71389e-11	-1.68376	0.447	0.958	2.83966e-06
ITM2A	1.01478e-10	4.05938	0.368	0.03	2.96651e-06
IFITM2	1.05902e-10	-1.46487	0.579	0.976	3.09585e-06
CFI	1.06566e-10	-1.89895	0.263	0.921	3.11523e-06
CAVIN1	1.16787e-10	-1.39612	0.816	0.976	3.41403e-06
TSC22D3	1.40349e-10	2.40721	0.895	0.648	4.10282e-06
ZYX	1.82453e-10	-2.50737	0.263	0.83	5.33366e-06
TRDN	1.86027e-10	7.34636	0.237	0	5.43813e-06
GDF10	1.86027e-10	5.69553	0.237	0	5.43813e-06
C20orf85	1.86027e-10	6.98061	0.237	0	5.43813e-06
SULF2	2.4025e-10	-2.20683	0.132	0.764	7.02323e-06
PEA15	3.22083e-10	-2.09095	0.237	0.867	9.41546e-06
ADAM12	3.62919e-10	-2.57355	0.211	0.824	1.06092e-05
MRPS6	4.00621e-10	-2.40145	0.237	0.855	1.17114e-05
ACTN1	4.07314e-10	-1.81533	0.474	0.958	1.1907e-05
CNN2	5.58261e-10	-1.65912	0.526	0.927	1.63197e-05
DPYSL3	6.30135e-10	-2.04179	0.211	0.861	1.84207e-05
LGALS1	6.42899e-10	-1.0043	0.921	1	1.87939e-05
PPP1R12B	6.95816e-10	-2.847	0.184	0.77	2.03408e-05
CST3	7.35056e-10	1.34803	0.974	0.952	2.14879e-05
UGP2	1.17827e-09	-1.92279	0.474	0.903	3.44444e-05
ALDH1A1	1.45569e-09	2.68029	0.737	0.315	4.25543e-05
NR3C1	1.47617e-09	2.34593	0.816	0.533	4.3153e-05
CCDC71L	1.53788e-09	-3.03559	0.132	0.733	4.49569e-05
AC020656.1	2.81312e-09	5.61679	0.237	0.006	8.2236e-05
TSPAN7	2.81312e-09	5.89836	0.237	0.006	8.2236e-05
SLC5A3	3.05454e-09	-3.00472	0.211	0.758	8.92935e-05
FBLN2	3.21392e-09	-2.28505	0.132	0.745	9.39526e-05
LDHA	3.67368e-09	-1.3591	0.763	0.945	0.000107393
CALD1	4.11861e-09	-1.22844	1	0.994	0.000120399
EIF3J	4.5258e-09	-2.16799	0.158	0.733	0.000132303
ENO1	4.58029e-09	-1.81492	0.553	0.939	0.000133895
SOCS3	4.6681e-09	-1.64095	0.237	0.867	0.000136463
LASP1	4.97686e-09	-1.63816	0.184	0.806	0.000145489
HIF1A	6.01844e-09	-2.00115	0.316	0.861	0.000175937
PDLIM5	7.05878e-09	-1.92321	0.342	0.848	0.000206349
OXTR	8.0713e-09	-5.41913	0.026	0.576	0.000235948
PPP2R1A	8.79912e-09	-1.76448	0.158	0.794	0.000257225
RAI14	9.32239e-09	-2.12548	0.263	0.806	0.000272522
CXCL17	9.32733e-09	4.39837	0.342	0.042	0.000272666
FXYD3	9.41818e-09	3.62365	0.421	0.079	0.000275322
ADCY3	1.06681e-08	-2.00561	0.316	0.879	0.000311861
FHL2	1.15771e-08	-1.78245	0.368	0.855	0.000338434
TPT1	1.32099e-08	-0.832795	1	1	0.000386164
NFKBIZ	1.34889e-08	-1.86354	0.211	0.745	0.00039432
TMEM176A	1.5067e-08	-2.12384	0.184	0.77	0.000440453
CCL2	1.61887e-08	-2.32505	0.237	0.788	0.000473245
FOSL2	1.75366e-08	-1.05354	0.211	0.812	0.000512648
MYH9	1.76526e-08	-1.37634	0.658	0.964	0.000516037
WFDC2	1.76661e-08	4.01028	0.474	0.121	0.000516433
CAVIN2	1.81415e-08	-4.58426	0.026	0.564	0.000530329
HCFC1R1	1.81693e-08	-1.61022	0.474	0.903	0.000531143
CDK6	1.93916e-08	-2.12853	0.237	0.788	0.000566874
PFN1	2.02994e-08	-1.25277	0.579	0.976	0.000593412
SESN3	2.12591e-08	2.14745	0.868	0.636	0.000621466
FAM183A	2.25868e-08	5.97861	0.184	0	0.000660281
SNTN	2.25868e-08	5.8326	0.184	0	0.000660281
FAT3	2.25868e-08	6.62764	0.184	0	0.000660281
CHST9	2.25868e-08	6.2783	0.184	0	0.000660281
COL6A1	2.50244e-08	-1.23242	0.895	0.994	0.000731538
COL5A1	2.63836e-08	-1.48542	0.605	0.964	0.000771273
LIMA1	2.66446e-08	-1.51488	0.737	0.964	0.000778903
RPL28	2.8056e-08	-0.777691	0.974	0.994	0.000820162
LTF	3.11045e-08	5.8491	0.211	0.006	0.000909278
AL357093.2	3.11045e-08	6.67185	0.211	0.006	0.000909278
NTM	3.37328e-08	-1.05208	0.184	0.8	0.000986112
PDLIM4	3.9214e-08	-1.94164	0.263	0.806	0.00114634
ADM	4.33377e-08	-5.63005	0.026	0.533	0.00126689
ANXA2	4.64617e-08	-1.06227	0.921	0.994	0.00135821
ACTG1	5.02053e-08	-1.07068	0.947	0.982	0.00146765
SOD2	5.10783e-08	-2.35306	0.237	0.8	0.00149317
PRKCSH	5.16158e-08	-1.82237	0.158	0.739	0.00150888
TPI1	5.23081e-08	-1.29491	0.658	0.945	0.00152912
CCL11	5.33581e-08	-4.99765	0.026	0.545	0.00155982
TMEM59	5.42401e-08	1.00747	0.947	0.909	0.0015856
S100A4	5.45555e-08	-1.32956	0.789	0.976	0.00159482
S100A6	5.76183e-08	-0.841799	1	0.994	0.00168436
SRGN	5.93913e-08	-1.83713	0.395	0.848	0.00173618
TPM4	6.16252e-08	-1.11713	0.842	0.982	0.00180149
C1orf198	6.22914e-08	-1.95951	0.158	0.691	0.00182097
TMSB10	6.38288e-08	-0.988196	0.895	0.988	0.00186591
MIR22HG	6.68452e-08	-1.91111	0.105	0.673	0.00195409
PGAM1	6.98213e-08	-1.52097	0.342	0.873	0.00204109
COL6A2	7.50746e-08	-1.05547	0.974	0.982	0.00219465
CYP4B1	8.38581e-08	5.81656	0.263	0.024	0.00245143
CAPS	8.76445e-08	5.04701	0.447	0.121	0.00256211
AK5	9.10635e-08	-2.39414	0.132	0.661	0.00266206
IGLC3	1.00341e-07	-2.57249	0.289	0.83	0.00293328
SHC1	1.01895e-07	-1.68279	0.289	0.806	0.00297871
NNMT	1.1316e-07	-1.19415	0.684	0.994	0.00330801
TGM2	1.21905e-07	-1.63572	0.474	0.939	0.00356366
KTN1	1.27827e-07	-1.15375	0.632	0.958	0.00373676
FXYD6	1.42449e-07	3.98049	0.368	0.073	0.0041642
TUBB	1.42965e-07	-1.26715	0.632	0.945	0.0041793
DTX3L	1.43583e-07	-3.41724	0.026	0.521	0.00419735
TRAPPC3L	1.45254e-07	-4.43972	0.026	0.509	0.00424621
ZBTB16	1.57993e-07	4.25814	0.342	0.061	0.00461861
MMP16	1.65551e-07	5.70309	0.237	0.018	0.00483954
PDK4	1.6666e-07	4.81922	0.316	0.048	0.00487196
DYNC1I1	1.77155e-07	3.88925	0.289	0.036	0.00517877
PIGR	1.9555e-07	4.39811	0.316	0.048	0.00571652
AC020916.1	2.14493e-07	-1.92644	0.263	0.782	0.00627028
VOPP1	2.17205e-07	-1.97974	0.158	0.667	0.00634954
ADAMTS1	2.1856e-07	-2.59009	0.158	0.673	0.00638917
JAKMIP2	2.4358e-07	4.81551	0.158	0	0.00712056
AGR3	2.4358e-07	6.04917	0.158	0	0.00712056
DIPK1C	2.4358e-07	5.87874	0.158	0	0.00712056
SP7	2.4358e-07	5.23552	0.158	0	0.00712056
DUSP1	2.47107e-07	-1.50394	0.474	0.897	0.00722368
LYZ	2.56125e-07	5.86234	0.395	0.097	0.00748729
ITM2B	2.64249e-07	0.724745	1	1	0.00772479
TMEM132C	2.72273e-07	4.86988	0.211	0.012	0.00795937
C4orf48	2.79867e-07	-1.48619	0.211	0.794	0.00818135
ADGRV1	2.84365e-07	5.67813	0.211	0.012	0.00831283
FOSB	2.88736e-07	-1.48683	0.579	0.945	0.00844061
ZC3H7B	2.93913e-07	-1.98649	0.079	0.618	0.00859197
MYOF	3.11418e-07	-1.14841	0.395	0.885	0.0091037
DNAJB4	3.1315e-07	-1.68179	0.132	0.63	0.00915431
FZD2	3.27402e-07	-1.48319	0.132	0.709	0.00957095
THBS4	3.36005e-07	4.8141	0.184	0.006	0.00982242
MYADM	3.83583e-07	-1.47314	0.474	0.897	0.0112133
MALT1	4.15031e-07	-3.34389	0.053	0.515	0.0121326
PKM	4.2796e-07	-0.920145	0.763	0.976	0.0125106
SELENOM	4.2877e-07	-0.817608	0.842	0.976	0.0125342
CCN4	4.47659e-07	-1.123	0.421	0.903	0.0130864
TMEM87B	4.51633e-07	-1.30424	0.158	0.673	0.0132026
DRC3	4.62094e-07	4.36102	0.263	0.03	0.0135084
SCG2	4.76445e-07	-2.89247	0.132	0.624	0.0139279
THBS1	4.84002e-07	-1.66156	0.632	0.933	0.0141488
EHBP1	5.03393e-07	-1.1391	0.158	0.715	0.0147157
MYLK	5.04905e-07	-1.38165	0.447	0.897	0.0147599
FLNA	5.0883e-07	-1.31087	0.684	0.976	0.0148746
LAMA2	5.23823e-07	4.26452	0.342	0.067	0.0153129
SLC16A3	5.94046e-07	-2.12349	0.211	0.697	0.0173658
SLC39A7	6.17662e-07	-1.60564	0.263	0.77	0.0180561
TMEM47	6.3469e-07	-1.3338	0.158	0.697	0.0185539
ITGA10	6.71746e-07	3.73387	0.316	0.055	0.0196371
MBNL2	6.91298e-07	-1.77067	0.316	0.758	0.0202087
IGF2	7.0478e-07	-1.92997	0.105	0.6	0.0206028
ZNF580	7.09623e-07	-2.14107	0.105	0.582	0.0207444
IGFBP5	7.14566e-07	1.23926	0.895	0.667	0.0208889
TMEM176B	7.31406e-07	-1.60575	0.289	0.8	0.0213812
EPB41L2	7.35655e-07	1.4443	0.816	0.727	0.0215054
DHRS3	7.61145e-07	-1.40049	0.263	0.806	0.0222505
LSP1	7.79692e-07	3.48384	0.316	0.055	0.0227927
MPZL1	8.03906e-07	-0.901521	0.289	0.824	0.0235006
VEGFA	8.29798e-07	-1.88223	0.342	0.812	0.0242575
TSC22D1	8.36395e-07	2.14512	0.789	0.709	0.0244503
SGIP1	8.76002e-07	-1.54651	0.132	0.648	0.0256082
BTG1	8.76316e-07	1.19487	0.895	0.739	0.0256173
CTSK	9.50887e-07	1.24363	0.842	0.83	0.0277973
TNS3	9.53157e-07	-1.49402	0.368	0.855	0.0278637
ITGA8	9.84605e-07	-1.92509	0.105	0.606	0.028783
PGK1	9.87768e-07	-1.6562	0.421	0.855	0.0288754
SSH1	1.01498e-06	-2.06437	0.132	0.612	0.029671
BNIP3	1.01579e-06	-2.18378	0.211	0.691	0.0296946
COL11A1	1.02129e-06	4.54497	0.447	0.145	0.0298554
TMEM158	1.04966e-06	-4.61347	0.026	0.467	0.0306846
NOVA1	1.05387e-06	3.36159	0.553	0.248	0.0308079
MGARP	1.08406e-06	-1.74503	0.132	0.612	0.0316904
VCAM1	1.0914e-06	-1.90991	0.342	0.818	0.031905
RGS4	1.2658e-06	-1.98366	0.158	0.673	0.0370032
C1orf122	1.27514e-06	-1.14466	0.289	0.848	0.037276
ANKRD13A	1.30321e-06	-1.96779	0.105	0.6	0.0380967
ACTB	1.37373e-06	-1.19424	0.947	0.988	0.0401582
DDAH1	1.37405e-06	-2.58304	0.105	0.558	0.0401675
CES1	1.38073e-06	3.99382	0.316	0.061	0.040363
FAM120A	1.44386e-06	-1.37051	0.237	0.776	0.0422084
BASP1	1.46621e-06	-1.24935	0.421	0.909	0.0428618
NDUFB11	1.47395e-06	-0.919905	0.263	0.879	0.043088
FMN2	1.58667e-06	-2.94909	0.026	0.473	0.046383
RPS20	1.65094e-06	-0.705866	0.895	0.994	0.0482619
LYPD6B	1.69821e-06	-3.14519	0.079	0.515	0.0496439
MAFB	1.78005e-06	1.86045	0.763	0.479	0.0520361
PGRMC2	1.8029e-06	-0.492106	0.342	0.824	0.0527042
ZFP36L2	1.84994e-06	1.26644	0.921	0.848	0.0540794
CAV1	1.86923e-06	-1.84903	0.263	0.752	0.0546433
NFKBIA	1.89172e-06	1.27894	0.842	0.758	0.0553006
TEAD1	2.08378e-06	-1.23741	0.447	0.903	0.0609153
TEX2	2.19488e-06	-1.50627	0.158	0.642	0.064163
JOSD2	2.39199e-06	-1.6802	0.211	0.673	0.0699252
TNFRSF12A	2.46333e-06	-2.07438	0.132	0.606	0.0720105
ALPK2	2.49772e-06	-4.27868	0	0.412	0.0730158
DRC1	2.60017e-06	5.48804	0.132	0	0.0760109
EPHA3	2.60017e-06	7.08347	0.132	0	0.0760109
GSTA1	2.60017e-06	6.31039	0.132	0	0.0760109
COL21A1	2.60017e-06	5.73455	0.132	0	0.0760109
DLX6	2.60017e-06	5.14707	0.132	0	0.0760109
ENKUR	2.60017e-06	5.57283	0.132	0	0.0760109
INSC	2.60017e-06	5.2343	0.132	0	0.0760109
C11orf97	2.60017e-06	6.01984	0.132	0	0.0760109
ACAN	2.60017e-06	6.25366	0.132	0	0.0760109
SEC14L3	2.60017e-06	5.32539	0.132	0	0.0760109
ACTN4	2.74135e-06	-1.02763	0.526	0.927	0.0801379
PIFO	2.74323e-06	5.38775	0.184	0.012	0.0801929
EPSTI1	2.80853e-06	-1.7281	0.158	0.655	0.0821016
CPED1	2.84251e-06	3.22976	0.447	0.158	0.0830952
PCDH20	2.8607e-06	4.60309	0.184	0.012	0.0836268
AP2S1	3.05036e-06	-1.28322	0.395	0.867	0.0891712
MALAT1	3.20481e-06	0.77562	1	0.988	0.0936863
TMEM97	3.40288e-06	-3.70823	0.026	0.442	0.0994764
WDR41	3.459e-06	-1.92558	0.079	0.527	0.101117
ATF3	3.52934e-06	-2.4898	0.158	0.594	0.103173
MUC5B	3.54372e-06	5.50819	0.158	0.006	0.103594
KIAA1671	3.54372e-06	5.23989	0.158	0.006	0.103594
DEPP1	3.59692e-06	-2.38773	0.158	0.612	0.105149
CCPG1	3.81562e-06	1.39821	0.816	0.727	0.111542
RAD23B	3.86029e-06	-1.76503	0.211	0.679	0.112848
SPSB1	4.55061e-06	-1.60993	0.105	0.576	0.133028
FTH1	4.63508e-06	-1.25623	0.974	1	0.135497
NIBAN2	4.64024e-06	-1.43153	0.132	0.612	0.135648
USP53	4.85502e-06	-1.22247	0.211	0.673	0.141927
IRF1	4.95429e-06	-1.28776	0.289	0.782	0.144829
PDLIM7	4.96338e-06	-1.23756	0.395	0.818	0.145095
GUCY1A1	5.03227e-06	-1.22927	0.342	0.861	0.147108
MEG8	5.47323e-06	-1.36215	0.184	0.685	0.159999
FLNC	5.60706e-06	-2.37494	0.053	0.491	0.163911
SYNPO	5.65379e-06	-1.06602	0.316	0.806	0.165277
IGLC1	5.75949e-06	-2.01415	0.237	0.703	0.168367
MEG3	5.78987e-06	-1.19707	0.605	0.927	0.169255
ELL2	5.80604e-06	-2.73642	0.053	0.467	0.169728
INHBA	5.81007e-06	-2.04298	0.237	0.691	0.169846
ARF4	6.43309e-06	-1.0197	0.447	0.903	0.188058
APP	6.56761e-06	0.695564	1	0.958	0.191991
XIST	6.67348e-06	1.50052	0.816	0.412	0.195086
TINAGL1	6.92478e-06	-2.02738	0.053	0.491	0.202432
EIF4A1	7.10324e-06	-0.710491	0.868	0.97	0.207649
RAB13	7.16767e-06	-1.40931	0.395	0.8	0.209533
SLC39A6	7.42654e-06	-1.51914	0.474	0.867	0.2171
GLIS3	7.80425e-06	-0.786615	0.079	0.521	0.228142
PPIA	8.12785e-06	-0.80461	0.711	0.988	0.237601
SGK1	8.14196e-06	-2.37613	0.158	0.594	0.238014
RBMS1	8.2936e-06	-1.06427	0.368	0.915	0.242447
CPXM2	8.34354e-06	-0.867859	0.474	0.97	0.243907
DAPK1	8.57134e-06	-2.70674	0.026	0.43	0.250566
PCGF2	8.62024e-06	-1.6144	0.079	0.533	0.251996
CARHSP1	8.82367e-06	-2.09929	0.132	0.552	0.257942
ERAP2	9.10355e-06	-0.500977	0.132	0.624	0.266124
ADRA2A	9.19667e-06	-1.22888	0.158	0.648	0.268846
CUL4A	9.35301e-06	-2.73938	0.026	0.424	0.273417
GREM2	9.47777e-06	-2.72164	0.053	0.467	0.277064
ACO2	9.52859e-06	-3.16456	0.026	0.406	0.278549
ANPEP	9.57188e-06	-1.62442	0.105	0.57	0.279815
HNRNPUL2	9.87362e-06	-1.15633	0.184	0.636	0.288635
CALM3	1.00556e-05	-0.935124	0.447	0.897	0.293954
FSTL3	1.02568e-05	-1.42156	0.211	0.661	0.299837
PRELP	1.02665e-05	4.00153	0.368	0.109	0.300119
GRK5	1.03355e-05	-2.66971	0.026	0.424	0.302139
CCN2	1.05042e-05	-1.46434	0.421	0.836	0.307068
NXN	1.05619e-05	-1.15113	0.342	0.794	0.308756
PIM1	1.08954e-05	-3.36931	0.026	0.418	0.318504
TMEM165	1.09759e-05	-1.13342	0.263	0.764	0.320858
SLC29A1	1.10027e-05	4.76047	0.237	0.036	0.321641
NPTN	1.1196e-05	-0.893294	0.342	0.812	0.327293
C1R	1.12135e-05	-0.67751	0.921	0.982	0.327804
OMD	1.13236e-05	3.56617	0.474	0.206	0.331023
LYPD2	1.135e-05	4.81879	0.237	0.036	0.331793
CUL4B	1.13516e-05	-1.55123	0.263	0.703	0.331842
SELENOP	1.16702e-05	1.1061	0.947	0.891	0.341154
FARP1	1.18188e-05	-1.46903	0.237	0.697	0.345499
UNC5B	1.20253e-05	1.70325	0.684	0.436	0.351535
C3	1.21235e-05	-5.02799	0	0.37	0.354407
TNKS1BP1	1.22309e-05	-1.17779	0.184	0.661	0.357545
COPA	1.24191e-05	-1.03089	0.289	0.83	0.363048
COTL1	1.31221e-05	-1.64658	0.211	0.673	0.383599
GPX3	1.31433e-05	-1.37106	0.263	0.752	0.384217
ADAMTS12	1.3513e-05	-2.70597	0.026	0.418	0.395025
FZD5	1.47044e-05	4.18706	0.184	0.018	0.429852
AKAP9	1.47494e-05	1.40075	0.842	0.818	0.431168
NOS1AP	1.50729e-05	-4.17188	0	0.364	0.440626
EIF4G1	1.50975e-05	-1.02593	0.316	0.776	0.441345
RPL13A	1.51542e-05	-0.50056	1	0.994	0.443002
TKT	1.55385e-05	-1.16473	0.211	0.703	0.454237
PAK2	1.56412e-05	-1.14481	0.184	0.648	0.457241
FSTL1	1.57368e-05	-0.889712	0.789	0.958	0.460035
S100A11	1.57966e-05	-0.636332	0.947	0.982	0.461781
SERPINB9	1.60237e-05	-1.70189	0.079	0.503	0.46842
BCKDK	1.63061e-05	-2.33604	0.053	0.455	0.476675
RAD21	1.63146e-05	-1.30959	0.421	0.861	0.476925
CTNNAL1	1.64066e-05	-1.28886	0.368	0.782	0.479615
SEMA5A	1.64289e-05	-1.1	0.263	0.794	0.480267
PIK3R2	1.65423e-05	-2.77839	0.053	0.43	0.483581
